# Supplementary material for: Protecting the healthcare workforce during COVID-19: a qualitative needs assessment of employee occupational health in the US national Veterans Health Administration
Source: PubMed Central journal article supplement — BMJ Open. 2021 Oct 3;11(10):e049134. doi: 10.1136/bmjopen-2021-049134 (PMC8491001; doi:10.1136/bmjopen-2021-049134), 2021-10-03
Supplement: bmjopen-2021-049134.draft_revisions.pdf [file bmjopen-2021-049134.draft_revisions.pdf]

# BMJ Open

BMJ Open is committed to open peer review. As part of this commitment we make the peer review history of every article we publish publicly available.

When an article is published we post the peer reviewers' comments and the authors' responses online. We also post the versions of the paper that were used during peer review. These are the versions that the peer review comments apply to.

The versions of the paper that follow are the versions that were submitted during the peer review process. They are not the versions of record or the final published versions. They should not be cited or distributed as the published version of this manuscript.

BMJ Open is an open access journal and the full, final, typeset and author-corrected version of record of the manuscript is available on our site with no access controls, subscription charges or pay-per-view fees (<http://bmjopen.bmj.com>).

If you have any questions on BMJ Open's open peer review process please email [info.bmjopen@bmj.com](mailto:info.bmjopen@bmj.com)

# BMJ Open

## Protecting the Healthcare Workforce During COVID-19: A Rapid Qualitative Needs Assessment of Employee Occupational Health in a National Healthcare System

|                               |                                                                                                                                                                                                                                                                                                                                                                                                                                                                                                                                                                                                                                                                                                                                                                                                                                                                                                                                                                                                                                                                                                                                                                                                                                                                                                                                                                                                                                                    |
|-------------------------------|----------------------------------------------------------------------------------------------------------------------------------------------------------------------------------------------------------------------------------------------------------------------------------------------------------------------------------------------------------------------------------------------------------------------------------------------------------------------------------------------------------------------------------------------------------------------------------------------------------------------------------------------------------------------------------------------------------------------------------------------------------------------------------------------------------------------------------------------------------------------------------------------------------------------------------------------------------------------------------------------------------------------------------------------------------------------------------------------------------------------------------------------------------------------------------------------------------------------------------------------------------------------------------------------------------------------------------------------------------------------------------------------------------------------------------------------------|
| Journal:                      | <i>BMJ Open</i>                                                                                                                                                                                                                                                                                                                                                                                                                                                                                                                                                                                                                                                                                                                                                                                                                                                                                                                                                                                                                                                                                                                                                                                                                                                                                                                                                                                                                                    |
| Manuscript ID                 | bmjopen-2021-049134                                                                                                                                                                                                                                                                                                                                                                                                                                                                                                                                                                                                                                                                                                                                                                                                                                                                                                                                                                                                                                                                                                                                                                                                                                                                                                                                                                                                                                |
| Article Type:                 | Original research                                                                                                                                                                                                                                                                                                                                                                                                                                                                                                                                                                                                                                                                                                                                                                                                                                                                                                                                                                                                                                                                                                                                                                                                                                                                                                                                                                                                                                  |
| Date Submitted by the Author: | 15-Jan-2021                                                                                                                                                                                                                                                                                                                                                                                                                                                                                                                                                                                                                                                                                                                                                                                                                                                                                                                                                                                                                                                                                                                                                                                                                                                                                                                                                                                                                                        |
| Complete List of Authors:     | <p>Brown-Johnson, Cati; VA Palo Alto Health Care System, Center for Innovation to Implementation ; Stanford University School of Medicine, Primary Care and Population Health</p> <p>McCaa, Matthew ; VA Palo Alto Health Care System, Center for Innovation to Implementation</p> <p>Giannitrapani , Susan; Wilmington VA Medical Center, Employee Occupational Health</p> <p>Singer, Sara; VA Palo Alto Health Care System, Center for Innovation to Implementation ; Stanford University School of Medicine, Primary Care and Population Health</p> <p>Lorenz, Karl; VA Palo Alto Health Care System, Center for Innovation to Implementation ; Stanford University School of Medicine, Primary Care and Population Health</p> <p>Yano, Elizabeth; University of California Los Angeles, Health Policy and Management ; VA Greater Los Angeles Healthcare System, Center for the Study of Healthcare Innovation, Implementation &amp; Policy</p> <p>Thanassi, Wendy; VA Palo Alto Health Care System, Employee Occupational Health ; Stanford University School of Medicine, Primary Care and Population Health</p> <p>DeShields, Cheyenne; VA Palo Alto Health Care System, Center for Innovation to Implementation ; Case Western Reserve University</p> <p>Giannitrapani, Karleen; VA Palo Alto Health Care System, Center for Innovation to Implementation ; Stanford University School of Medicine, Primary Care and Population Health</p> |
| Keywords:                     | COVID-19, QUALITATIVE RESEARCH, OCCUPATIONAL & INDUSTRIAL MEDICINE                                                                                                                                                                                                                                                                                                                                                                                                                                                                                                                                                                                                                                                                                                                                                                                                                                                                                                                                                                                                                                                                                                                                                                                                                                                                                                                                                                                 |
|                               |                                                                                                                                                                                                                                                                                                                                                                                                                                                                                                                                                                                                                                                                                                                                                                                                                                                                                                                                                                                                                                                                                                                                                                                                                                                                                                                                                                                                                                                    |

SCHOLARONE™  
Manuscripts

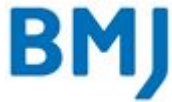

I, the Submitting Author has the right to grant and does grant on behalf of all authors of the Work (as defined in the below author licence), an exclusive licence and/or a non-exclusive licence for contributions from authors who are: i) UK Crown employees; ii) where BMJ has agreed a CC-BY licence shall apply, and/or iii) in accordance with the terms applicable for US Federal Government officers or employees acting as part of their official duties; on a worldwide, perpetual, irrevocable, royalty-free basis to BMJ Publishing Group Ltd ("BMJ") its licensees and where the relevant Journal is co-owned by BMJ to the co-owners of the Journal, to publish the Work in this journal and any other BMJ products and to exploit all rights, as set out in our [licence](#).

The Submitting Author accepts and understands that any supply made under these terms is made by BMJ to the Submitting Author unless you are acting as an employee on behalf of your employer or a postgraduate student of an affiliated institution which is paying any applicable article publishing charge ("APC") for Open Access articles. Where the Submitting Author wishes to make the Work available on an Open Access basis (and intends to pay the relevant APC), the terms of reuse of such Open Access shall be governed by a Creative Commons licence – details of these licences and which [Creative Commons](#) licence will apply to this Work are set out in our licence referred to above.

Other than as permitted in any relevant BMJ Author's Self Archiving Policies, I confirm this Work has not been accepted for publication elsewhere, is not being considered for publication elsewhere and does not duplicate material already published. I confirm all authors consent to publication of this Work and authorise the granting of this licence.

1  
2  
3 **Protecting the Healthcare Workforce During COVID-19: A Rapid Qualitative Needs**  
4  
5 **Assessment of Employee Occupational Health in a National Healthcare System**  
6  
7

8 Cati Brown-Johnson, PhD,<sup>1,2</sup> Matt McCaa, MSOT,<sup>1</sup> Susan N. Giannitrapani, MSN, APRN,  
9  
10 CCRN, NP,<sup>3</sup> Sara Singer, PhD MBA,<sup>1,2</sup> Karl A. Lorenz, MD, MSHS,<sup>1,2</sup> Elizabeth Yano, PhD,  
11  
12 MSPH,<sup>4,5</sup> Wendy Thanassi, MD,<sup>2,6</sup> Cheyenne DeShields, BS,<sup>1,7</sup> Karleen F. Giannitrapani, PhD,  
13  
14 MPH<sup>1,2</sup>  
15

16  
17 <sup>1</sup> VA Palo Alto Healthcare System, Center for Innovation to Implementation  
18

19 <sup>2</sup> Stanford University School of Medicine, Primary Care and Population Health  
20

21 <sup>3</sup> Wilmington VA Medical Center, Employee Occupational Health  
22

23 <sup>4</sup> Center for the Study of Healthcare Innovation, Implementation & Policy, VA Greater  
24  
25 LA Healthcare System  
26

27 <sup>5</sup> University of California Los Angeles, Department of Health Policy and Management  
28

29 <sup>6</sup>VA Palo Alto Healthcare System, Employee Occupational Health  
30

31 <sup>7</sup> Case Western Reserve University  
32  
33

34  
35 Running title: COVID-19 Needs Assessment: Employee Occupational Health  
36

37 Key words: Occupational and industrial medicine, COVID-19, Qualitative research  
38

39 Corresponding author:

40 Karleen Giannitrapani PhD MPH MA  
41 Center for Innovation to Implementation (Ci2i), VA Palo Alto Health Care System  
42 Stanford University School of Medicine, Palo Alto, CA  
43 Address: VA Palo Alto Health Care System,  
44 795 Willow Road (152 MPD), Menlo Park, CA 94025  
45 Email: Karleen@stanford.edu  
46 Phone: (650) 493-5000, dial 1, then 2, ext: 23725  
47 Fax: (650) 617-2736  
48

49 Abstract count: 246

50 Word count: 3499

51 References: 29

52 Tables: 2

53 Figures: 0

54 Appendices: 2  
55  
56  
57  
58  
59  
60

## Abstract

**Objective:** Early in the pandemic, Veterans Health Administration (VHA) Employee Occupational Health (EOH) providers were tasked with assuming a central role in coordinating employee COVID screening and clearance for duty, representing entirely novel EOH responsibilities. In a rapid qualitative needs assessment, we aimed to identify learnings from the field to support the vastly expanding role of EOH providers in a national healthcare system.

**Methods:** We employed rapid qualitative analysis of key informant interviews in a maximal variation sample on the parameters of job type, rural vs urban, and provider gender. We interviewed n=21 VHA EOH providers between July-December 2020. This sample represents 15 facilities from diverse regions of the United States (large, medium, and small facilities in the Mid-Atlantic; medium sites in the South; large facilities in the West and Pacific Northwest).

**Results:** Five interdependent needs included: 1) infrastructure to support employee population management, including tools that facilitate infection control measures such as contact tracing (e.g., employee-facing electronic health records, coordinated databases); 2) mechanisms for information-sharing across settings (e.g., VHA listserv), especially for changing policy and protocols; 3) sufficiently-resourced staffing using detailing to align EOH needs with human resource capital; 4) connected and resourced local and national leaders; 5) strategies to support health care worker mental health.

**Conclusions:** Our needs assessment highlights local and system level barriers and facilitators of EOH assuming expanded roles during COVID. Integrating changes both within and across systems and with alignment of human capital will enable EOH preparedness for future challenges.

## Strengths and limitations of this study

- This is the first study to evaluate the expanding role of employee occupational health (EOH) in response to the COVID-19 pandemic.
- The results of this study will help scale the dynamically changing job demands of EOH, improving preparedness in advance of future pandemics.
- Our analysis reveals needs of frontline EOH employees to keep health care workers (HCWs) safe from COVID-19 as an occupational hazard. Ensuring the safety of HCWs will help ensure the safety of the community at large.
- These lessons are generalizable both beyond the Veterans Health Administration and beyond COVID-19.
- Due to the condensed timeline in this rapid analysis, we used transcripts in a more limited way for quote verification and validation/query of initial themes.

## Introduction

In the United States, health care workers (HCWs) have been heavily burdened by COVID-19 due to increased frontline demands and increased exposure to the coronavirus, at times representing up to 20% of cases reported statewide.[1,2] Beyond serious illness, HCWs have been overworked during pandemic surges with worst-case impacts extending even to suicide.[3,4] While every aspect of healthcare delivery has been impacted by the COVID-19 pandemic, supporting and protecting HCWs from COVID-19 as an occupational hazard must be of paramount of importance.

Given the heightened vulnerability of HCWs during this pandemic, employee occupational health (EOH) providers have been crucial in ensuring the safety of HCWs and thus the continuous delivery of health care. In the American Veterans Health Administration (VHA), EOH assumes responsibility for the “safety and health” of over half-million HCWs, trainees, and volunteers.[5] Representing a national healthcare system, the VHA serves over 9 million veterans, with 10,000 in Community Living Centers, VA nursing homes vulnerable to COVID-19.[5,6] Furthermore, VHA comprises 1,255 healthcare facilities and employs at least 322,030 full-time HCWs,[5] the majority of whom fall in the OSHA very high risk category for SARS-CoV-2 transmission.[7] VHA additionally interfaces with more than 73,000 active volunteers, 15,000 academic faculty, and 127,000 medical trainees.[5]

While VHA EOH has always been responsible for protecting this breadth of employees from workplace hazards, the COVID-19 pandemic has required EOH to assume novel roles in managing the spread of infectious disease and to adapt as COVID-19 guidelines rapidly change. On March 15, 2020, the US Deputy Under Secretary for Health for Operations and Management circulated guidance allowing asymptomatic HCWs exposed to COVID-19 to continue to work after consulting EOH and requiring HCWs to report to EOH if symptoms appeared at work, tasking EOH with a central role in COVID management.[8] Since then, VHA EOH policies surrounding COVID-19 have continuously evolved—online media and VHA forums suggest frontline clinicians have struggled to keep up with emerging COVID recommendations.[9,10] Other challenges stem from national PPE shortages, which resulted in social media cries from HCWs to “#GetMePPE.”[11] Similarly, VHA EOH was not consistently equipped with appropriate PPE at nationwide facilities,[12,13] creating even more difficulties for EOH to fulfill new roles.

Our study leverages the perspectives of EOH to assess the barriers to and facilitators of EOH role expansion on the frontlines of supporting HCWs. In seeking to understand how best to support their expanding role, recent EOH publications on COVID have relied on expert opinion,[14,15] literature review,[16] and theory-based modeling[17,18]—major themes include potential negative impacts of employee anxiety about COVID[17] and downstream impacts of telework such as social isolation or physical/ergonomic issues.[14] EOH healthcare literature reinforces these more general predictions of anxiety (especially related to burnout), and has additionally highlighted risk factors surrounding overwork (e.g., documenting requirements for electronic health records) and the potential protective impact of positive leadership.[19] Data-based reports of EOH applied to healthcare have targeted more narrow COVID issues such as provision of employee assistance programs (EAPs) for mental health support[20,21] or COVID screening.[22]

We undertook a rapid needs assessment for assuming new (and dynamically changing) EOH roles during COVID-19. Understanding needs and facilitating role readiness continues to be particularly critical as understanding about COVID changes and guidance evolves.[23]

## Methods

Approach: We conducted 21 key informant qualitative interviews with EOH providers using a purposive sampling approach[24] seeking variation on the parameters of provider type (lead providers - MD/DO, mid-level providers - NP/PA, RNs), setting (size, rural/urban, and geographic region), and provider gender to represent a wide experience of EOH from this national health system (see Table 1).

Our qualitative research team (CBJ, MM, KG) developed the interview guide with input from two EOH subject matter experts (WT - Physician, SG - nurse practitioner). The research advisory team (SS, KL, EY) reviewed interview questions and procedures. The interview protocol addressed factors that could support or undermine readiness of EOH providers for COVID-19 expanded roles, notably documentation, reporting, staffing, etc. (see Appendix A for interview protocol). In our purposive sample we used a snowball approach[24] starting from subject matter experts and attended to sample variation to capitalize on diverse perspectives.

We sent potential participants an email including a study information sheet inviting them to interview, followed up by email twice, and scheduled interviews with email respondents. During the phone interviews conducted by PhD trained qualitative researcher CBJ, investigators (CBJ, MM) obtained consent for audio recording. We captured notes during interviews for rapid analysis and created verbatim transcripts from audio recordings.

Analysis: We used the Stanford Lightning Report approach, a rapid qualitative approach intended to create actionable products for wide distribution,[25] to identify primary themes from key informant interviews. Within VHA, rapid qualitative approaches have successfully been used to provide real-time insights backed by high-quality research methods.[26] We created a preliminary Lightning Report based on themes from research notes and post-interview debriefing calls (conducted with entire co-author research team) once we collected half of the intended data sample (2 months from first interview, n=10; see Appendix B for interim report). We circulated this Lightning Report to study advisors, VHA EOH central leadership, and participants for feedback, constituting a modified Synthesized Member Check.[27] Incorporating EOH leader feedback with the additional interviews, CBJ and KG formalized a final theme list. We continued debriefing interviews as a team in weekly meetings, working from initial Lightning Report themes to consolidate findings into five themes representing needs with theme definitions and examples. CD transcribed interviews and identified exemplary quotes from transcripts representing the major themes.

## Results

We invited 95 potential participants and conducted 21 interviews with EOH providers (response rate 22%). Interviews with MD/DO (n=10), NP/PA (n=8), and RN (n=3) participants were 30-60 minutes between July and December 2020. This sample represented 15 diverse VHA facilities from varied regions of the country, specifically large (>4000 employees), medium (2000>4000 employees), and small (<2000 employees) facilities in the Mid-Atlantic and Northeast; medium and large sites in South and Southwest; large facilities in the West and Pacific Northwest (see Table 1 for sample demographics).

We report needs in five themes (see Table 2 for exemplary quotes of each theme) organized around systems and people at the local/micro (i.e., within VHA facilities) and national/macro (i.e., across the VHA system) level. Systems needs included: 1) infrastructure to support population management (local/micro and national/macro) and 2) mechanisms for information-sharing across the system (macro). People/human resources needs included: 3) sufficiently resourced staffing through detailing at the local level (micro) and 4) connected and resourced

1  
2  
3 local and national leaders (micro/macro). A final theme around 5) mental health needs crossed  
4 both systems and people domains.  
5

6 *Theme 1. Infrastructure to support employee population management*

7 Across sites, respondents mentioned system needs at the micro and macro level by participants  
8 around population management. Previous EOH provider experience with database  
9 management (e.g., flu vaccination) facilitated population management, while lack of electronic  
10 health record (EHR) tools was a major barrier. Employee population management needs  
11 revolved around tools and mechanisms - for instance employee-facing EHR or coordinated  
12 spreadsheet databases - that could prioritize employee privacy while facilitating infection control  
13 measures such as contact tracing.  
14

15  
16 At a micro-level, independent VHA facilities created excel spreadsheets to track employee  
17 testing; these in-house solutions were important for reporting the volume of employees served.  
18 In October 2020, VHA instituted an employee EHR at the macro-level, but some EOH providers  
19 perceived it as “too little, too late... lack of cohesive connective EHR keeps people from optimal  
20 clinical care.”(MD)  
21

22 EOH providers suggested employee population management infrastructure needs  
23 encompassed much more than EHR. These needs also include: additional clinical space that  
24 can adequately address limit cross-contamination for persons under investigation (PUI); support  
25 opportunities for innovation such as the use of QR code readers for testing and COVID  
26 vaccination; and integrated backend infrastructure with workers compensation programs.  
27 Locally, EOH requested being consulted when sites set up new systems to manage COVID. In  
28 one worst-case scenario, no one consulted EOH in the set-up of summer outside COVID  
29 testing. As a result, “no one did risk assessment for heat stroke [in a parking lot] and there were  
30 no measures for shade... [They were] testing patients in plastic lawn chairs – unsafe for  
31 employees.”(MD)  
32

33  
34 Participants cited lack of resources and recent cut-backs in EOH as major barriers to better  
35 population management. For instance, the EHR instituted in October was a new version of an  
36 EHR system that had existed some years earlier as version “1.0” but had been dropped during a  
37 budget cut. In contrast, facilitators included previous experience with infectious disease  
38 outbreaks, training in public health management, and incident command system training. One  
39 site reporting successful tracking and management shared that the “first thing I did was make a  
40 centralized database... [but this was] a personal clinical decision.”(RN)  
41

42 *Theme 2. Mechanisms for information-sharing across settings*

43 Providers reflected a strong need for information-sharing within and across VHAs. Facilitators to  
44 information flow included access to external information sources and experts, as well as an  
45 existing all-VHA-EOH listserv. Barriers to information-sharing included the unmoderated status  
46 of the listserv and the high volume of new information.  
47

48 External information sources, such as the US Centers for Disease Control (CDC) website, and  
49 even more broadly the internet, supported information flow: “...how I learned more and [tracked]  
50 the movement of the pandemic... [I] went to bed reading the CDC.”(NP) Outside of state-  
51 sponsored information channels, strong connections with academic medicine facilitated  
52 information sharing. Providers reported benefitting from “daily huddles with [academic infectious  
53 disease providers when the] knowledge base [was] exploding.”(MD) A minority of providers  
54 reported closely reading and reviewing the VHAs Guidebook for Employee Health, which is 600  
55  
56  
57  
58  
59  
60



1  
2  
3 pages, but there was evidence that this resource was underutilized: “questions on [the listserv]  
4 show that people don’t use Guidebook.”(MD)  
5

6 A listserv accessible to all VHA EOH was a major facilitator for information sharing. Many saw  
7 this peer-led listserv to be “a big advantage.”(RN) Providers reported the listserv, if adequately  
8 moderated by allocated experts, could support information-sharing: “ask a question [on the  
9 listserv], [experts] give the instruction... This is what we should be doing.”(MD) Even in its  
10 unmoderated state in 2020, without the listserv some reported, “we would all probably quit...  
11 [the listserv is] critical.”(NP)  
12

13 Barriers to information-sharing revolved around the extremely high volume of new information  
14 about COVID and limitations of an unmoderated listserv. Due to the inexperience of temporary  
15 or untrained staff, the listserv could be perceived by more senior providers as “extremely  
16 frustrating... every two weeks someone is asking that [same] question [due to] revolving door  
17 [staffing].”(MD) Indeed, some providers reflected a broader sense of dis cohesive information-  
18 sharing due to the listserv: “Questions running rampant on the forum, there’s no control.”(NP)  
19  
20

### 21 *Theme 3. Sufficiently resourced staffing through detailing and cross-training*

22 Not surprisingly, EOH providers reported that people, time, and skills were needed to  
23 adequately resource EOH (e.g., sufficient FTE per HCW population) in the local site micro-  
24 environment. Alignment of human resource capital with EOH workforce needs was reported to  
25 facilitate new role requirements and protect the EOH workforce; lack of trained and consistent  
26 staff locally was a major barrier.  
27

28 For many EOH providers, a principle barrier to fulfilling EOH’s new responsibilities was lack of  
29 staffing. Additionally, staffing needs doubled or tripled during surges, but numerous sites  
30 reported that these “temporary folks who were detailed [were] slowly being pulled back into their  
31 own units,”(NP) representing a major risk as the US met the winter COVID surge. EOH  
32 providers wanted to be part of the conversation about staffing needs as they felt their site VHA  
33 executives might not always comprehend the scope of their expanded role or demands on their  
34 time.  
35  
36

37 EOH providers were also put in the position of managing employees’ fear of COVID. Additional  
38 staffing was one strategy used to manage this employee anxiety. Multiple providers reported  
39 staff coming in early, staying late, and working weekends to return calls: “I put myself in their  
40 position. How would I feel [with no information]... My job is to protect them.”(NP) Another  
41 provider ratified spending extra hours at work to return calls, “People get so scared.”(NP)  
42

43 Suggested strategies for additional staffing included creating standard EOH staffing ratios per  
44 employee (FTE), coverage/cross-training for flexible scale-up and scale-down, and alignment  
45 with services who could cover or bedtalled to EOH when needed. Providers reported  
46 inconsistent staffing during the COVID crisis: “they would give us staff for only certain days and  
47 certain times.” Furthermore, even with adequate people on hand, “the biggest thing we  
48 wanted... is cross-train[ing]” in areas vital to population health: call center management, testing,  
49 follow-up, and positive case management (RN).  
50

### 51 *Theme 4. Connected and resourced local and national EOH leaders*

52 Providers emphasized the importance of having coherent guidance from national EOH leaders  
53 and interdisciplinary facility level executives. Successes at the local level were perceived as  
54 facilitated by interdisciplinary connections and inclusion in “incident command”. EOH providers  
55 wanted national level leaders to direct with authority during Covid-19: “What you’d like is  
56  
57  
58  
59  
60

1  
2  
3 occupational health [central office leaders] coming out with rules to say 'This is what we need to  
4 do'."(MD)  
5

6 At a micro level, local leaders who were well-networked were able to connect with crisis  
7 response "incident command" structures, facilitating better EOH support for HCWs. These  
8 incident command structures generally included site leaders and daily meetings/huddles within  
9 EOH. COVID-19 teams such as this were appropriately reported as focusing on the "veterans'  
10 perspective."(NP) EOH providers were perceived to be the "only" role at this level of local  
11 leaders representing employee interests, needs, and concerns.  
12

13  
14 By contrast, the perception of a barrier with respect to lack of adequate resources for leaders at  
15 the national level may have contributed to the sense that "there isn't a coherent union of all the  
16 VHA [centers across the country]" (MD). VHA macro-level EOH leadership was perceived to  
17 need "more staffing, more presence, structure that helps with outreach to all VAs... Boots on the  
18 ground."(MD) Providers perceived specific staff at national VHA EOH leadership to be  
19 "excellent...extremely dedicated," but the positions were understaffed compared to the amount  
20 of work to be done: "There is just one of them [1.0 FTE]" (MD). One recommended approach to  
21 effective centralized leadership included having 2-3 full time experts who could "travel to places  
22 that need experts...like consultants."(MD)  
23

#### 24 *Theme 5. Strategies to address HCW mental health concerns*

25 EOH providers, due to their role as a central point of contact with employees with a health-  
26 related workplace concern, found themselves in need of strategies to support HCW mental  
27 health during COVID. Barriers to accessing such tools related to the volume of HCW need and  
28 lack of local support for EOH. Additionally, EOH providers at multiple sites described  
29 themselves as on the brink of burnout due to exceptional and stressful workplace demands.  
30

31 Both overwork and experiencing trauma (e.g., excessive patient deaths or the death of a co-  
32 worker) came up as examples negatively impacted employee mental health. In one site, where  
33 nearly 50% of older patients had died in a COVID surge, HCWs were grieving, distressed, and  
34 bereaved. Facing the scale of this loss, local EOH leadership incorporated chaplain assistance  
35 in addition to referring HCW to EAPs. Looking to the future, one provider expressed that their  
36 EOH group knew "to expect tsunami of depression, anxiety, etc. from COVID" based on reading  
37 reports coming out of Japan, but this provider still did not have specific approaches to address  
38 this need locally (NP).  
39  
40

41 Outside of COVID contagion, EOH providers recognized the impact on HCW mental health as  
42 the major impact of the pandemic on employee health: "Anxiety is the barrier...Questions aren't  
43 just about work – 'what about my toddlers and daycare and my 90-year-old grandmother'."(MD)  
44 Some noted referring employees to EAPs for issues like "tensions at home" but perceived that  
45 "mental health support is still a [gap]." (MD) EOH attempted a wide range of strategies to support  
46 mental health for their employees, from referring HCWs to overwhelmed EAPs to system  
47 solutions such as facilitating easy access to VHA-issued laptops for employees to be able to  
48 work from home while on quarantine.  
49

50 EOH provider burnout and distress was another mental health-related barrier for better EOH  
51 care. EOH providers consistently reported that they themselves were overwhelmed, and some  
52 reported nearing burnout. Multiple providers reported considering quitting - "I got pretty close to  
53 resigning"(MD) - due to the volume of work and positive cases. Furthermore, brittle VHA  
54 protocols not related to COVID could plague EOH providers and contribute to burnout and  
55 distress. For example, in one instance, an EOH provider was repeatedly asked to justify  
56  
57  
58  
59  
60

1  
2  
3 overtime hours, even as their office was reduced to a single staff member managing >3000  
4 employees.  
5

## 6 **Discussion**

7 Understanding how best to rapidly expand roles and scale the dynamically changing job  
8 demands of EOH during an infectious outbreak is needed in advance of future pandemics. We  
9 took on this needs assessment when guidance in March 2020 from VHA national leadership  
10 forced EOH to the front and center of the organization's response. Particularly we were  
11 concerned that in order to minimize staffing shortages, healthcare organizations may choose to  
12 encourage potentially contagious but asymptomatic health personnel to work. Having EOH  
13 providers navigate this reality is complex, nuanced, and something for which they had not  
14 prepared. EOH needed to learn, adapt, and create new processes on the fly in a high stakes  
15 setting.  
16

17  
18 In this first systematic account of national EOH provider experiences, we found needs at the  
19 micro/local and macro/national level centered on both systems and people. Facilitators of EOH  
20 assuming new challenging and dynamically changes roles during COVID included: a) training  
21 or access to expertise (in infectious diseases, public health management, and disaster  
22 management); b) existing mechanisms for information-sharing (national reports from CDC and a  
23 VHA-specific listserv); c) flexible and responsive staffing; and d) leveraging other institutional  
24 expertise not previously affiliated with EOH (e.g., chaplains to support mental health and  
25 bereavement). Primary barriers to EOH assuming expanded roles were related to funding for  
26 systems (e.g., EHR implementation) and people including limited staffing and leadership at both  
27 local and national levels.  
28

29  
30 As the COVID pandemic persists, the role of employee occupational health providers in national  
31 healthcare systems should not be under-valued. Their role is likely underestimated or  
32 unconsidered in many settings though it may be critical to the safety of the healthcare  
33 workforce. Further, EOH's potential role in minimizing COVID spread among HCWs is directly  
34 relevant to the safety of employees and their families, vulnerable patients, and the community at  
35 large.  
36

37 *Promising practices beyond VHA.* Despite the fluctuation of recommendations from some  
38 national agencies (e.g., CDC), our EOH providers reported relying heavily on external agency  
39 standards to inform their local response. Ideally, national leadership could provide enough  
40 guidance that in times of crisis individual sites are not learning by themselves; inter-site  
41 communication gave EOH providers a community to engage in shared learning and accelerate  
42 spread of learnings, processes, and policy adaptations. Thinking beyond acute disasters, a  
43 high-functioning national EOH community in an integrated system could potentially positively  
44 address long-standing health and civil wellness issues (e.g., racism and racial inequality).  
45

46 *Promising practices beyond COVID-19.* These lessons from the COVID-19 pandemic critically  
47 inform future EOH preparedness. Past healthcare crises have pointed to the demand for  
48 decisive leadership, collaborative networks, and employee monitoring systems,[28] echoing  
49 the needs of VHA EOH. Although EOH providers felt VHA piloted the employee EHR too late in  
50 response to COVID-19, this EHR system will likely prove useful in the future. As we sit in the  
51 wake of increasing epidemics and natural disasters,[29] it is crucial that we recognize both the  
52 immediate and long-term benefits of equipping EOH with the tools to expand their role in  
53 managing HCW safety.  
54  
55  
56  
57  
58  
59  
60

1  
2  
3 *Limitations.* To rapidly get early insights to the field we leveraged a rapid qualitative analytic  
4 approach (over more traditional qualitative methods) to optimize for garnering in-depth frontline  
5 provider insights to prepare for dissemination of the COVID vaccine. Due to the condensed  
6 timeline of the project, the analytic team used transcripts in a more limited way for quote  
7 verification and validation/query of initial themes. We were ultimately able to get early results in  
8 two months, and some recommendations originating from our participants are already being  
9 enacted by VHA.  
10

11 *Conclusion.* In our highly-networked world, employee occupational health will consistently be at  
12 the forefront of disaster management and will continue to be central in future pandemics. A  
13 focus on EOH in healthcare will be a strong step towards truly honoring the effort HCWs have  
14 put forward in this pandemic, by keeping them safe in their places of work. As one of our  
15 participants highlighted, “Employees are the key asset, [but] without occupational health  
16 professionals... we are not able to support and optimize the health of employees.”  
17  
18

19 *Acknowledgments:* We would like to thank all the providers who participated in interviews and  
20 our partnership with VA occupational health leadership. Natalie Connell should be  
21 acknowledged for her help with manuscript preparation. This study was reviewed and approved  
22 by the Stanford and VHA IRB, #56617.  
23

24 *Author contributions:* KFG, SNG, and CBJ were responsible for the conception and design of  
25 this study. Research advisors, KAL, SS, and EY helped CBJ, KFG, MM, and CD design the  
26 interview protocol. SNG and WT facilitated recruitment of EOH providers. CBJ and MM  
27 conducted data collection, and CD transcribed interviews and flagged important quotations. CBJ  
28 and KFG drafted the manuscript, with substantial input and review from all authors. All authors  
29 approved the final manuscript.  
30

31 *COI:* The authors have no COI to report. Wendy Thanassi and Susan Giannitrapani are VA  
32 occupational health employees; they facilitated recruitment and commented on synthesized  
33 results.  
34

35  
36 *Patients and public involvement:* Patients were not involved in this qualitative analysis exploring  
37 perspectives of EOH providers.  
38

39 *Data sharing:* De-identified data can be made available upon reasonable request.  
40

41 *Funding source:* VA HSR&D C19 20-207 (PI Giannitrapani).  
42  
43  
44  
45  
46  
47  
48  
49  
50  
51  
52  
53  
54  
55  
56  
57  
58  
59  
60

## References

- 1 Spencer J. Why we're tracking every US health worker who dies from coronavirus. The Guardian. 2020. <https://www.theguardian.com/us-news/2020/apr/15/why-were-tracking-every-us-health-worker-who-dies-from-coronavirus> (accessed 4 Dec 2020).
- 2 Kambhampati AK. COVID-19—Associated Hospitalizations Among Health Care Personnel. *Morbidity and Mortality Weekly Report* 2020;**69**. doi:10.15585/mmwr.mm6943e3
- 3 Gulati G, Kelly BD. Physician suicide and the COVID-19 pandemic. *Occup Med (Lond)* Published Online First: 4 June 2020. doi:10.1093/occmed/kqaa104
- 4 Danhauer SC, Files K, Freischlag JA. Physician Suicide—Reflections on Relevance and Resilience. *JAMA Surg* 2020;**155**:721–2. doi:10.1001/jamasurg.2020.1345
- 5 Veterans Health Administration. About VHA - Veterans Health Administration. <https://www.va.gov/health/aboutvha.asp> (accessed 4 Dec 2020).
- 6 U. S. Government Accountability Office. VA Nursing Home Care: VA Has Opportunities to Enhance Its Oversight and Provide More Comprehensive Information on Its Website. Published Online First: 2 August 2019. <https://www.gao.gov/products/GAO-19-428> (accessed 14 Dec 2020).
- 7 Occupational Safety and Health Administration. Worker Exposure Risk to COVID-19. 2020. <https://www.osha.gov/coronavirus> (accessed 17 Dec 2020).
- 8 Liberman S. Memorandum. Coronavirus (COVID-19) Guidance for Work Recommendations for Asymptomatic Healthcare Personnel after Exposure to a COVID-19 Patient. U.S. Department of Veterans Affairs, Deputy Undersecretary for Health for Operations and Management 2020.
- 9 Butler CR, Wong SPY, Wightman AG, *et al*. US Clinicians' Experiences and Perspectives on Resource Limitation and Patient Care During the COVID-19 Pandemic. *JAMA Netw Open* 2020;**3**:e2027315. doi:10.1001/jamanetworkopen.2020.27315
- 10 Massarweh N, Itani K, Tsai T. Maximizing the US Department of Veterans Affairs' Reserve Role in National Health Care Emergency Preparedness—The Fourth Mission. *JAMA Surg* 2020;**155**:913–4. doi:10.1001/jamasurg.2020.4153
- 11 Padilla M. 'It Feels Like a War Zone': Doctors and Nurses Plead for Masks on Social Media. The New York Times. 2020. <https://www.nytimes.com/2020/03/19/us/hospitals-coronavirus-ppe-shortage.html> (accessed 14 Dec 2020).
- 12 Sinclair RR, Allen T, Barber L, *et al*. Occupational Health Science in the Time of COVID-19: Now more than Ever. *Occup Health Sci* 2020;1–22. doi:10.1007/s41542-020-00064-3
- 13 US Department of Veterans Affairs, Veterans Health Administration. Veterans Health Administration (VHA) Coronavirus Disease 2019 (COVID-19) Response Report. 2020. <https://www.publichealth.va.gov/n-coronavirus/> (accessed 14 Dec 2020).
- 14 Bouziri H, Smith DRM, Descatha A, *et al*. Working from home in the time of COVID-19: how to best preserve occupational health? *Occup Environ Med* 2020;**77**:509–10. doi:10.1136/oemed-2020-106599
- 15 Tsai C. Personal Risk and Societal Obligation Amidst COVID-19. *JAMA* 2020;**323**:1555–6. doi:10.1001/jama.2020.5450
- 16 Parker LD. The COVID-19 office in transition: cost, efficiency and the social responsibility business case. *Accounting, Auditing & Accountability Journal* 2020;**33**:1943–67. doi:10.1108/AAAJ-06-2020-4609
- 17 Trougakos JP, Chawla N, McCarthy JM. Working in a pandemic: Exploring the impact of COVID-19 health anxiety on work, family, and health outcomes. *Journal of Applied Psychology* 20200924;**105**:1234. doi:10.1037/apl0000739
- 18 Stefanini GG, Azzolini E, Condorelli G. Critical Organizational Issues for Cardiologists in the COVID-19 Outbreak: A Frontline Experience from Milan, Italy. *Circulation* 2020;**141**:1597–9. doi:10.1161/CIRCULATIONAHA.120.047070

- 1  
2  
3 19 Skorzewska N. A clinician's view from the frontline: UV light and other strategies to reduce  
4 aerosol transmission of COVID-19 and protect health workers. *Global Biosecurity* 2020;**1**.  
5 doi:10.31646/gbio.60
- 6 20 Buselli R, Baldanzi S, Corsi M, *et al*. Psychological Care of Health Workers during the  
7 COVID-19 Outbreak in Italy: Preliminary Report of an Occupational Health Department  
8 (AOUP) Responsible for Monitoring Hospital Staff Condition. *Sustainability* 2020;**12**:5039.  
9 doi:10.3390/su12125039
- 10 21 Coronavirus Disease (COVID-19) Situation Reports.  
11 <https://www.who.int/emergencies/diseases/novel-coronavirus-2019/situation-reports>  
12 (accessed 14 Dec 2020).
- 13 22 Boustead K, McDowall K, Baker KF, *et al*. Establishing a healthcare worker screening  
14 programme for COVID-19. *Occup Med (Lond)* 2020;**70**:456–7.  
15 doi:10.1093/occmed/kqaa114
- 16 23 Miake-Lye IM, Delevan DM, Ganz DA, *et al*. Unpacking organizational readiness for change:  
17 an updated systematic review and content analysis of assessments. *BMC Health Serv Res*  
18 2020;**20**. doi:10.1186/s12913-020-4926-z
- 19 24 Bernard HR. *Research methods in anthropology: qualitative and quantitative approaches*.  
20 4th ed. Lanham, MD: : AltaMira Press 2006.
- 21 25 Brown-Johnson C, Safaeinili N, Zionts D, *et al*. The Stanford Lightning Report Method: A  
22 comparison of rapid qualitative synthesis results across four implementation evaluations.  
23 *Learn Health Syst* 2019;**4**. doi:<https://doi.org/10.1002/lrh2.10210>
- 24 26 Hamilton AB, Brunner J, Cain C, *et al*. Engaging multilevel stakeholders in an  
25 implementation trial of evidence-based quality improvement in VA women's health primary  
26 care. *Behav Med Pract Policy Res* 2017;**7**:478–85. doi:10.1007/s13142-017-0501-5
- 27 27 Birt L, Scott S, Cavers D, *et al*. Member Checking: A Tool to Enhance Trustworthiness or  
28 Merely a Nod to Validation? *Qualitative Health Research* Published Online First: 22 June  
29 2016. doi:10.1177/1049732316654870
- 30 28 Khan Y, O'Sullivan T, Brown A, *et al*. Public health emergency preparedness: a framework  
31 to promote resilience. *BMC Public Health* 2018;**18**:1344. doi:10.1186/s12889-018-6250-7
- 32 29 Santibañez S, Polgreen PM, Beekmann SE, *et al*. Infectious Disease Physicians'  
33 Perceptions About Ebola Preparedness Early in the US Response: A Qualitative Analysis  
34 and Lessons for the Future. *Health Security* 2016;**14**:345–50. doi:10.1089/hs.2016.0038  
35  
36  
37  
38  
39  
40  
41  
42  
43  
44  
45  
46  
47  
48  
49  
50  
51  
52  
53  
54  
55  
56  
57  
58  
59  
60

1  
2  
3 **Tables**  
4

5 Table 1. Respondent and site characteristics.  
6

7 **Providers (n=21)**

|                        |              |    |
|------------------------|--------------|----|
| 8 <b>Type</b>          |              |    |
| 9                      | NP/PA        | 8  |
| 10                     | RN           | 3  |
| 11 <b>Gender</b>       |              |    |
| 12                     | Women        | 14 |
| 13                     | Men          | 7  |
| 14                     |              |    |
| 15 <b>Site (n=15)</b>  |              |    |
| 16 <b>Location</b>     |              |    |
| 17                     | Northeast    | 5  |
| 18                     | Mid-Atlantic | 3  |
| 19                     | Midwest      | 2  |
| 20                     | South        | 1  |
| 21                     | Southwest    | 1  |
| 22                     | West         | 3  |
| 23 <b>Size</b>         |              |    |
| 24                     | Small        | 6  |
| 25                     | Mid          | 3  |
| 26                     | Large        | 6  |
| 27 <b>Rural/ Urban</b> |              |    |
| 28                     | Rural        | 4  |
| 29                     | Urban        | 11 |

30  
31  
32  
33  
34  
35  
36  
37  
38  
39  
40  
41  
42  
43  
44  
45  
46  
47  
48  
49  
50  
51  
52  
53  
54  
55  
56  
57  
58  
59  
60

Table 2. Need Statement with Exemplary Quotes

| Theme                                                             | Need Statement                                                                                                                                                                                                                                                                        | Exemplary Quotes                                                                                                                                                                                                                                                                                                                                                                                                                                                                                                                                | Intervention Examples                                                                                    |
|-------------------------------------------------------------------|---------------------------------------------------------------------------------------------------------------------------------------------------------------------------------------------------------------------------------------------------------------------------------------|-------------------------------------------------------------------------------------------------------------------------------------------------------------------------------------------------------------------------------------------------------------------------------------------------------------------------------------------------------------------------------------------------------------------------------------------------------------------------------------------------------------------------------------------------|----------------------------------------------------------------------------------------------------------|
| Theme 1: Infrastructure to support employee population management | EOH Providers reported “drowning” without a complete electronic health record for employees: “We need an electronic medical chart!” Without this EHR, contact tracing was perceived to be highly challenging: “any other corporation would have this – who works where and for whom.” | “There’s many, many things that an electronic medical record, specifically designed for employee health, would do for us... that would be a lot of the surveillance programs that we have to run [existing patient medical record] is of no use with respect to tracking flu vaccinations in employees, and so we have to set up separate databases for that. And databases are always a little messy. You know, accidents happen with databases, and data gets lost.” -MD                                                                      | <ul style="list-style-type: none"> <li>EHR for EOH (system and macro level)</li> </ul>                   |
| Theme 2: Mechanisms for information sharing across settings       | EOH Providers found themselves constantly “reinventing the wheel” and need a “more centralized clearing house for protocols” and systems to “lean” on.                                                                                                                                | <p>“And of all things the listserv has been a big advantage for that because the—they can ask a question and anybody can answer those questions, and online is very— whenever they ask a question, give the instruction that says what we’re doing so that it’s very clear this is what this instruction says we should be doing. And then we’d standardize it across the way and through the entire VA.”-MD</p> <p>“So I use our EOC, so our emergency operations command was brought forth from the incident command system, and that has</p> | <ul style="list-style-type: none"> <li>Listserv moderated by experts (system and macro level)</li> </ul> |



|                                                                   |                                                                                                                                                                                                                                        |                                                                                                                                                                                                                                                                                                                                                                                                                                                                                                                                                                                                                                                                      |                                                                                                            |
|-------------------------------------------------------------------|----------------------------------------------------------------------------------------------------------------------------------------------------------------------------------------------------------------------------------------|----------------------------------------------------------------------------------------------------------------------------------------------------------------------------------------------------------------------------------------------------------------------------------------------------------------------------------------------------------------------------------------------------------------------------------------------------------------------------------------------------------------------------------------------------------------------------------------------------------------------------------------------------------------------|------------------------------------------------------------------------------------------------------------|
|                                                                   |                                                                                                                                                                                                                                        | <p>been the biggest help as far as knowing policy changes because as a nurse, I don't often get the memorandums whenever they're sent, and I don't often get all of the nursing updates from a national level that are sent. And so I lean heavily on EOC and infection prevention. We're really close with our infection prevention team because we work so hard with them over this COVID that they give us the updates that I don't always get, and they help us formulate a plan."-RN</p>                                                                                                                                                                        |                                                                                                            |
| <p>Theme 3: Sufficiently resourced staffing through detailing</p> | <p>EOH providers felt challenged by the expectation that EOH "maintain EOH duties [while] still having everything else to do". Some providers believed: "We still need more people but it's not a priority [to the organization]."</p> | <p>"We've been putting— staff has been putting in a lot of overtime because we don't have sufficient staff to take on all the tasks and keep people at their 40 hour weeks. We are tapping into, as I said, the labor pool, but that unfortunately turns out to be transient, and while they may be very competent, we train them and then they have to go back."-MD</p> <p>"The problem with the facility occ health...is when a facility does staffing, who do they need staffing for? Veteran Care. Occ health is an ancillary. It's when we have staff left over, enough....we'll just have staffing come there [to EOH]. It's not a priority, you know?"-MD</p> | <ul style="list-style-type: none"> <li>• Cross-trained staff (people, and macro or micro level)</li> </ul> |

|                                                                                                                                                                                                                                                                                                                                                                                                                                                                                                               |                                                                                                                                                                                                                                                                                                                              |                                                                                                                                                                                                                                                                                                                                                                                                                                                                                                                                                                                                                                                                                                                                                                                                                                                                                                                                                                                                                                                                                                                                                          |                                                                                                                               |
|---------------------------------------------------------------------------------------------------------------------------------------------------------------------------------------------------------------------------------------------------------------------------------------------------------------------------------------------------------------------------------------------------------------------------------------------------------------------------------------------------------------|------------------------------------------------------------------------------------------------------------------------------------------------------------------------------------------------------------------------------------------------------------------------------------------------------------------------------|----------------------------------------------------------------------------------------------------------------------------------------------------------------------------------------------------------------------------------------------------------------------------------------------------------------------------------------------------------------------------------------------------------------------------------------------------------------------------------------------------------------------------------------------------------------------------------------------------------------------------------------------------------------------------------------------------------------------------------------------------------------------------------------------------------------------------------------------------------------------------------------------------------------------------------------------------------------------------------------------------------------------------------------------------------------------------------------------------------------------------------------------------------|-------------------------------------------------------------------------------------------------------------------------------|
| <p>1<br/>2<br/>3<br/>4<br/>5<br/>6<br/>7<br/>8<br/>9<br/>10<br/>11<br/>12<br/>13<br/>14<br/>15<br/>16<br/>17<br/>18<br/>19<br/>20<br/>21<br/>22<br/>23<br/>24<br/>25<br/>26<br/>27<br/>28<br/>29<br/>30<br/>31<br/>32<br/>33<br/>34<br/>35<br/>36<br/>37<br/>38<br/>39<br/>40<br/>41<br/>42<br/>43<br/>44<br/>45<br/>46<br/>47<br/>48<br/>49<br/>50<br/>51<br/>52<br/>53<br/>54<br/>55<br/>56<br/>57<br/>58<br/>59<br/>60</p> <p>Theme 4: Connected, resourced, and supportive local and national leaders</p> | <p>“The leadership we need is experienced MD—an MD in leadership who is experienced with occupational health, with mass testing, with policy, with infectious disease, and that leadership should be several people deep. Because one person cannot handle 400,000 employees and all the policies that are around that.”</p> | <p>“I was the only person there [in EOH clinic] and I was trying to have a conversation with him [local site leadership] and there were patients coming in to see me, so the leadership team, you know, got a first-hand look and said ‘hey, she needs some help in here’... by then we’d just seen the volume of, or the increase in volume of workload, that I had in employee health. And immediately they put together a plan to try to get me some support to help handle and manage the calls and manage and navigate through COVID-19.”-NP</p> <p>“If you look at occ health being the VA, it is pretty much fractured into the local levels. If you go from one VA to another VA facility, the programs will be different. There is no central leadership guidance that maintains that control or that maintains enough standards. And especially to say, “are you following what we decided we’re going to do?”-MD</p> <p>“COVID doesn’t live in a vacuum. It lives in the setting of our already busy full-time jobs. So, leadership needs more people and more experience and they should be highly trained. And we don’t have that.” -MD</p> | <ul style="list-style-type: none"> <li>• Additional FTE for national leadership positions (people and macro level)</li> </ul> |
|---------------------------------------------------------------------------------------------------------------------------------------------------------------------------------------------------------------------------------------------------------------------------------------------------------------------------------------------------------------------------------------------------------------------------------------------------------------------------------------------------------------|------------------------------------------------------------------------------------------------------------------------------------------------------------------------------------------------------------------------------------------------------------------------------------------------------------------------------|----------------------------------------------------------------------------------------------------------------------------------------------------------------------------------------------------------------------------------------------------------------------------------------------------------------------------------------------------------------------------------------------------------------------------------------------------------------------------------------------------------------------------------------------------------------------------------------------------------------------------------------------------------------------------------------------------------------------------------------------------------------------------------------------------------------------------------------------------------------------------------------------------------------------------------------------------------------------------------------------------------------------------------------------------------------------------------------------------------------------------------------------------------|-------------------------------------------------------------------------------------------------------------------------------|

|                                                                                   |                                                                                                                   |                                                                                                                                                                                                                                                                                                                                                                                                                                                                                                                                                                                                                                                                                                                                                                                                                                                                                                                                                                                                                                                                                                                                                                                                                                  |                                                                                                                                                                                                      |
|-----------------------------------------------------------------------------------|-------------------------------------------------------------------------------------------------------------------|----------------------------------------------------------------------------------------------------------------------------------------------------------------------------------------------------------------------------------------------------------------------------------------------------------------------------------------------------------------------------------------------------------------------------------------------------------------------------------------------------------------------------------------------------------------------------------------------------------------------------------------------------------------------------------------------------------------------------------------------------------------------------------------------------------------------------------------------------------------------------------------------------------------------------------------------------------------------------------------------------------------------------------------------------------------------------------------------------------------------------------------------------------------------------------------------------------------------------------|------------------------------------------------------------------------------------------------------------------------------------------------------------------------------------------------------|
| <p>Theme 5: Strategies to address HCW and EOH provider mental health concerns</p> | <p>“Mental health support is still a gap” for both frontline healthcare workers and EOH providers themselves.</p> | <p>“The first week in July we had 92 employees with confirmed positive. Those are confirmed positive. We had over 150 at one time I think, employees that were out with symptoms consistent with COVID or high-risk exposures at home or something. So that, that’s a pretty big increase. I honestly, I got burnt out. The nurse practitioners and I got burnt out. I got pretty close to resigning because it wasn’t working very well. But we did talk to people, people started understanding, particularly as the numbers went up. And we got some detailed help. So we brought in some nursing staff, administrative staff, PSAs, and some of the comp and pen docs came over.”-MD</p> <p>“Definitely the anxiety is the barrier. If people freak out, you know, it’s kind of like, they’re like ‘well, the face shield doesn’t cover the whole face.’ Well, okay... You covered your mucus membranes, right? So, like what’s the problem? There’s no problem. But then I’m kind of telling you that; I don’t tell them that because, again, like I said, it’s a little bit like this thing where if we have so much exposure that we kind of get a little bit desensitized, you know, but other people might not.”-MD</p> | <ul style="list-style-type: none"> <li>External EAPs, so that HCWs do not have to access mental health care from in-house colleagues (System and people, possible micro and macro levels)</li> </ul> |
|-----------------------------------------------------------------------------------|-------------------------------------------------------------------------------------------------------------------|----------------------------------------------------------------------------------------------------------------------------------------------------------------------------------------------------------------------------------------------------------------------------------------------------------------------------------------------------------------------------------------------------------------------------------------------------------------------------------------------------------------------------------------------------------------------------------------------------------------------------------------------------------------------------------------------------------------------------------------------------------------------------------------------------------------------------------------------------------------------------------------------------------------------------------------------------------------------------------------------------------------------------------------------------------------------------------------------------------------------------------------------------------------------------------------------------------------------------------|------------------------------------------------------------------------------------------------------------------------------------------------------------------------------------------------------|

1  
2  
3  
4  
5  
6  
7  
8  
9  
10  
11  
12  
13  
14  
15  
16  
17  
18  
19  
20  
21  
22  
23  
24  
25  
26  
27  
28  
29  
30  
31  
32  
33  
34  
35  
36  
37  
38  
39  
40  
41  
42  
43  
44  
45  
46  
47  
48  
49  
50  
51  
52  
53  
54  
55  
56  
57  
58  
59  
60

For peer review only

**INTERVIEW GUIDE****OCCUPATIONAL HEALTH'S ROLE IN COVID – NEEDS ASSESSMENT AND LESSONS LEARNED INTERVIEW GUIDE****BACKGROUND**

What is your role?

*[Appreciative Inquiry]*

What did you like best about your job prior to COVID? Why did you go into occupational health?

**CHANGE IN PRACTICES WITH COVID**

*[Forensic experiential trauma interview]*

This has been a completely unexpected and transformative time. There was a VA policy announced in middle of March (the 15<sup>th</sup>) that put Occupational Health in the middle of employee healthcare and safety. Tell me about your experience since hearing about this policy.

What did you do first?

What would you have wanted to do differently?

**IDEAL**

What is your ideal approach to managing Occupational Health now that we have some experience with a global pandemic?

What helps you move towards this ideal?

What barriers keep you from this ideal?

**INFORMATION**

What resources do you use to keep up-to-date about new policies?

Are you aware of the forum?

Where do you get your information about COVID?

How about the VA's response to it nationally? and locally?

How useful do you find these resources?

How have you been communicating new policies with stakeholders?

How are you integrating emerging evidence into practice?

**POLICIES**

What policies have you been able to use or adapt?

What has been your process for adapting these policies?

What additional policies are needed at the national, VISN, and local levels?

**STAFFING**

What staffing model do you use?

What would be the appropriate staffing model for managing a pandemic like COVID?

**SERVICE ALIGNMENT**

What service is occupational health aligned with at your facility?

Has this ever changed?

## INTERVIEW GUIDE

1  
2  
3 Are changes in service disruptive?  
4 What service should occupational health be aligned with?  
5  
6

### **FLU SEASON PREPAREDNESS**

7  
8 How are you planning to deal with flu and COVID-19 at the same time?  
9 How, if at all, have you updated approaches for PPE and environmental safety related to flu  
10 season?  
11  
12

### **PPE and MASK N95**

13  
14 What are your local protocols for PPE and masks?  
15 How have these changed over time? What triggered their change?  
16  
17

### **TELEWORK**

18  
19 How has telehealth impacted occupational health?  
20 How, if at all, are you preparing for any mental and/or physical health changes from increased  
21 telework?  
22  
23

### **LIGHTNING REPORT**

24  
25 What's working about how your local occupational health group is managing new  
26 responsibilities with COVID?  
27 What needs to change for you in order for you to provide better occupational health care?  
28  
29

### **SILVER LININGS**

30  
31 Have there been any benefits from COVID in your role or Occupational Health?  
32  
33

### **SNOWBALL**

34  
35 Who else should we talk to about the role of Occupational Health and COVID?  
36  
37  
38  
39  
40  
41  
42  
43  
44  
45  
46  
47  
48  
49  
50  
51  
52  
53  
54  
55  
56  
57  
58  
59  
60

## VA OCCUPATIONAL HEALTH NEEDS ASSESSMENT

### Problem Statement

In the United States, medical personnel carry a heavy burden regarding COVID-19 – in some states representing up to 20% of known coronavirus cases. Within the Veterans Health Administration (VHA), early involvement of Occupational Health (OH) may have protected employees, Veterans, and their families from even worse transmission rates. The roles and responsibilities of OH providers have greatly expanded and continue to evolve as the pandemic progresses.

### Background

With the emergence of COVID-19, on March 15<sup>th</sup>, 2020, the Deputy Under Secretary of Health for Operations and Management sent out a memo to Department of Veterans Affairs Network Directors putting Occupational Health in the center of the organizational response. As OH providers and teams across the VHA mobilized for management of COVID-19 spread and employee health, investigators at the Center for Innovation to Implementation (Ci2i) undertook a rapid national needs assessment. The goal of this research was to identify best practices and gaps in order to support the expanding role of OH providers by documenting early learnings and needs in advance of additional COVID-19 waves and future infectious pandemics.

### Executive Summary

1. VHA Occupational Health (OH) providers want standing policies for viral pandemics that include: standard chain-of-command; supply control; identified experts; protocols for delegating responsibilities; uniformity across sites
2. Gaps need to be addressed at the level of 1) structure (adequate staffing); 2) tools (EHR/community exposure communication); and 3) national-level leadership/communication
3. Opportunities exist to: leverage information-sharing via an existing national OH listserv; standardize and spread response through alignment with CDC and other federal protocols/agencies; develop an employee-focused electronic record to facilitate population management strategies

### Approach

This Lightning Report approach (Brown-Johnson et al., 2019) leverages rapid qualitative analysis to present main ideas from key informant interviews in a maximal variation sample. Insights are drawn from the input of n=11 OH providers (MD=5, NP=4, RN=2) interviewed for 30-60 minutes between July 7<sup>th</sup> and September 30<sup>th</sup> 2020. This sample is geographically diverse, representing 8 VHA facilities from diverse regions of the country (large, medium, and small facilities in the Mid-Atlantic; medium sites in South; large facilities in the West and Pacific Northwest). Key summary points are organized at the national and local level.

### Results

|                   |                                                                                                                                                                                                                                                                                                                                                                                                                                                                                                                                                                                                                                   |
|-------------------|-----------------------------------------------------------------------------------------------------------------------------------------------------------------------------------------------------------------------------------------------------------------------------------------------------------------------------------------------------------------------------------------------------------------------------------------------------------------------------------------------------------------------------------------------------------------------------------------------------------------------------------|
| National Insights | <b>Facilitators to the ability of Occupational Health to adapt and expand roles and responsibilities in the context of COVID-19</b>                                                                                                                                                                                                                                                                                                                                                                                                                                                                                               |
|                   | <i>Peer-to-peer support</i> <ul style="list-style-type: none"> <li>• Occupational Health Forum listserv facilitated connection among OH providers across the country</li> <li>• Collegial spirit – sites willingly shared database tracking templates in Excel, Standard Operating Procedures (SOPs, i.e., policies), and information</li> <li>• Highly trained experts were available and accessible through the listserv. Ideally, funding would have been available to support expert time spent answering queries from across the VHA in this venue</li> </ul> <i>CDC seen as central information and source for policies</i> |

For more information please contact study PI - Dr. Karleen Giannitrapani [karleen.giannitrapani@va.gov](mailto:karleen.giannitrapani@va.gov)

VA OCCUPATIONAL HEALTH NEEDS ASSESSMENT

**Challenges/Gaps**

*Lack of centralized resources and policy, resulting in:*

- OH providers' desire for regular communication from national OH leadership
- Lack of protocols leading to individual sites creating protocols and policies (SOP) out of urgency as opposed to well thought out strategy
- Provider overwhelm, an example of which was related to how frequently the CDC updated/changed policies and recommendations
- Recognition of the need to build a "deeper bench" for OH – more expertise or experience from OH-adjacent specialties (e.g. infectious disease, public health, etc.)

*Tools needed*

- Electronic health record (EHR) and tracking during outbreaks to look across care populations (employees, patients, veterans)
- Employee management: Population health infrastructure exists for patients, allowing for large-scale problem-solving during disasters. In an infectious disease outbreak, employees become a population that also needs management

**Ideas from the field**

- As a policy-making position, national OH leadership needs full-time resources and highly-networked leadership with expertise and interdisciplinary leadership support, eg. from occupational health, mass testing, policy, infectious disease. Leadership would benefit from being "several people deep" with policy experience
- Emphasize communication: a) Reinstate previous OH 1.0FTE divided among five national subject matter experts to answer Forum listserv questions ("incredibly valuable") to provide direction and clinical guidance; b) more frequent and bi-directional communication between national OH leadership and front-line OH providers and staff
- Ideal: SOPs delivered from National leadership to all VHAs
- TB policy has been useful (ie., blood-born pathogen policy), and especially experience with a live TB incident in the last few years, which included contact tracing. Suggestion for viral pandemic drills considering how valuable lived experience has been

Local Issues and Insights

**Facilitators to the ability of OH to adapt and expand roles and responsibilities in the context of COVID-19**

*Staffing*

- Successful strategies for local staffing included: shifting ("detailing") staff from other services or temporarily-closed clinics, accessing transient labor pool, engaging travel nurses

*Local leadership and networks*

- When OH local leadership was well-networked across specialties within the local site, there was success in raising OH-related employee concerns to incident command
- Local leadership involvement in OH (e.g. site level executive leadership volunteering to detail with OH during surges) directly resulted in additional resources and leadership understanding of OH problems and needs
- OH demonstrated their value through involvement with local COVID-specific incident command; some sites leveraged that perceived value to secure more permanent staffing

For more information please contact study PI - Dr. Karleen Giannitrapani [karleen.giannitrapani@va.gov](mailto:karleen.giannitrapani@va.gov)



## VA OCCUPATIONAL HEALTH NEEDS ASSESSMENT

**Challenges/Gaps***Staffing*

- Inexperienced/temporary staff resulted in lack of continuity, skills, and OH “know-how”
- Temporary staff were removed too quickly from OH (after having been detailed during surges)
- OH departments were chronically understaffed prior to COVID, putting them at an initial deficit
- Providers articulated burnout risk: No one took a break- “Local OH worked every day from the start of COVID through July”
- Site OH leaders emphasized they need a way to quantify/ justify the need for higher staffing (e.g., FTE per employee population)

*Electronic Health Record (EHR)*

- OH needed proper tools for tracking, charting, reporting, calculating. Without tools (eg. EHR), OH unable to leverage modern and efficient standing infrastructure (eg. QR codes for vaccines)
- Limited ability to use population management strategies
- Some VAs lacked current databases of who their employees were or where they worked (need better integration with updates from human resources)

**Ideas from the field**

- For large sites (4000+), procure coordinators for major OH health tasks (call center, testing, tracking/reporting, etc.) to distribute responsibilities within OH
- Institute programs for cross-training to OH, which will be vital to recruit new talent to OH and prepare for future crises
- Set expectations for potential staff flexing with cross-training through OH; prepare to pool staff resources across specialties (primary care, hospital, OH, etc.)
- Standardize across sites to leverage the work individual sites have done, for example template Excel & Access databases for calls, testing, contact tracing, and testing scheduling
- Develop a whole-person health record that respects and prioritizes employee privacy
- Possible funding source: move funding from new employee physical exams to EHR – even without physical exams since March there were low to no instances of new-hires being unfit for work

**Next steps**

We will conduct additional interviews moving towards capturing the experience of OH providers that are located in smaller facilities and sites serving various regions of the country. We will also explicitly target sites serving rural populations.

**Acknowledgements**

This work is supported by a VA Health Services Research and Development (HSR&D) rapid pilot (C19 20-207) to improve the VHA’s rapid response to COVID-19. Team members include Karleen Giannitrapani PhD, Karl Lorenz MD, Sara Singer PhD, Cati Brown-Johnson PhD, Matthew McCaa MTOT, and Cheyenne Deshields BS of VA HSR&D Ci2i; Elizabeth Yano PhD from VA HSR&D CSHIP; VA Occupational Health provider advisors.

**Lightning Report Method**

For more information about this method, see: Brown-Johnson, C, Safaeinili, N, Zions, D, et al. The Stanford Lightning Report Method: A comparison of rapid qualitative synthesis results across four implementation evaluations. *Learn Health Sys.* 2020; 4:e10210. <https://doi.org/10.1002/lrh2.10210>

For more information please contact study PI - Dr. Karleen Giannitrapani [karleen.giannitrapani@va.gov](mailto:karleen.giannitrapani@va.gov)

Principal Investigator: Dr. Karleen Giannitrapani, PhD

VA HSR&D Project #: C19 20-207

September 30, 2020

VA OCCUPATIONAL HEALTH NEEDS ASSESSMENT

For peer review only

For more information please contact study PI - Dr. Karleen Giannitrapani [karleen.giannitrapani@va.gov](mailto:karleen.giannitrapani@va.gov)

# BMJ Open

## Protecting the Healthcare Workforce During COVID-19: A Qualitative Needs Assessment of Employee Occupational Health in the US National Veterans Health Administration

|                                 |                                                                                                                                                                                                                                                                                                                                                                                                                                                                                                                                                                                                                                                                                                                                                                                                                                                                                                                                                                                                                                                                                                                                                                                                                                                                                                                                                                                                         |
|---------------------------------|---------------------------------------------------------------------------------------------------------------------------------------------------------------------------------------------------------------------------------------------------------------------------------------------------------------------------------------------------------------------------------------------------------------------------------------------------------------------------------------------------------------------------------------------------------------------------------------------------------------------------------------------------------------------------------------------------------------------------------------------------------------------------------------------------------------------------------------------------------------------------------------------------------------------------------------------------------------------------------------------------------------------------------------------------------------------------------------------------------------------------------------------------------------------------------------------------------------------------------------------------------------------------------------------------------------------------------------------------------------------------------------------------------|
| Journal:                        | <i>BMJ Open</i>                                                                                                                                                                                                                                                                                                                                                                                                                                                                                                                                                                                                                                                                                                                                                                                                                                                                                                                                                                                                                                                                                                                                                                                                                                                                                                                                                                                         |
| Manuscript ID                   | bmjopen-2021-049134.R1                                                                                                                                                                                                                                                                                                                                                                                                                                                                                                                                                                                                                                                                                                                                                                                                                                                                                                                                                                                                                                                                                                                                                                                                                                                                                                                                                                                  |
| Article Type:                   | Original research                                                                                                                                                                                                                                                                                                                                                                                                                                                                                                                                                                                                                                                                                                                                                                                                                                                                                                                                                                                                                                                                                                                                                                                                                                                                                                                                                                                       |
| Date Submitted by the Author:   | 29-Jun-2021                                                                                                                                                                                                                                                                                                                                                                                                                                                                                                                                                                                                                                                                                                                                                                                                                                                                                                                                                                                                                                                                                                                                                                                                                                                                                                                                                                                             |
| Complete List of Authors:       | Brown-Johnson, Cati; VA Palo Alto Health Care System, Center for Innovation to Implementation ; Stanford University School of Medicine, Primary Care and Population Health<br>McCaa, Matthew ; VA Palo Alto Health Care System, Center for Innovation to Implementation<br>Giannitrapani , Susan; Wilmington VA Medical Center, Employee Occupational Health<br>Singer, Sara; VA Palo Alto Health Care System, Center for Innovation to Implementation ; Stanford University School of Medicine, Primary Care and Population Health<br>Lorenz, Karl; VA Palo Alto Health Care System, Center for Innovation to Implementation ; Stanford University School of Medicine, Primary Care and Population Health<br>Yano, Elizabeth; University of California Los Angeles, Health Policy and Management ; VA Greater Los Angeles Healthcare System, Center for the Study of Healthcare Innovation, Implementation & Policy<br>Thanassi, Wendy; VA Palo Alto Health Care System, Employee Occupational Health ; Stanford University School of Medicine, Primary Care and Population Health<br>DeShields, Cheyenne; VA Palo Alto Health Care System, Center for Innovation to Implementation ; Case Western Reserve University<br>Giannitrapani, Karleen; VA Palo Alto Health Care System, Center for Innovation to Implementation ; Stanford University School of Medicine, Primary Care and Population Health |
| <b>Primary Subject Heading</b>: | Occupational and environmental medicine                                                                                                                                                                                                                                                                                                                                                                                                                                                                                                                                                                                                                                                                                                                                                                                                                                                                                                                                                                                                                                                                                                                                                                                                                                                                                                                                                                 |
| Secondary Subject Heading:      | Health services research, Qualitative research, Public health                                                                                                                                                                                                                                                                                                                                                                                                                                                                                                                                                                                                                                                                                                                                                                                                                                                                                                                                                                                                                                                                                                                                                                                                                                                                                                                                           |
| Keywords:                       | COVID-19, QUALITATIVE RESEARCH, OCCUPATIONAL & INDUSTRIAL MEDICINE                                                                                                                                                                                                                                                                                                                                                                                                                                                                                                                                                                                                                                                                                                                                                                                                                                                                                                                                                                                                                                                                                                                                                                                                                                                                                                                                      |
|                                 |                                                                                                                                                                                                                                                                                                                                                                                                                                                                                                                                                                                                                                                                                                                                                                                                                                                                                                                                                                                                                                                                                                                                                                                                                                                                                                                                                                                                         |

SCHOLARONE™  
Manuscripts

1  
2  
3  
4  
5  
6  
7  
8  
9  
10  
11  
12  
13  
14  
15  
16  
17  
18  
19  
20  
21  
22  
23  
24  
25  
26  
27  
28  
29  
30  
31  
32  
33  
34  
35  
36  
37  
38  
39  
40  
41  
42  
43  
44  
45  
46  
47  
48  
49  
50  
51  
52  
53  
54  
55  
56  
57  
58  
59  
60



I, the Submitting Author has the right to grant and does grant on behalf of all authors of the Work (as defined in the below author licence), an exclusive licence and/or a non-exclusive licence for contributions from authors who are: i) UK Crown employees; ii) where BMJ has agreed a CC-BY licence shall apply, and/or iii) in accordance with the terms applicable for US Federal Government officers or employees acting as part of their official duties; on a worldwide, perpetual, irrevocable, royalty-free basis to BMJ Publishing Group Ltd ("BMJ") its licensees and where the relevant Journal is co-owned by BMJ to the co-owners of the Journal, to publish the Work in this journal and any other BMJ products and to exploit all rights, as set out in our [licence](#).

The Submitting Author accepts and understands that any supply made under these terms is made by BMJ to the Submitting Author unless you are acting as an employee on behalf of your employer or a postgraduate student of an affiliated institution which is paying any applicable article publishing charge ("APC") for Open Access articles. Where the Submitting Author wishes to make the Work available on an Open Access basis (and intends to pay the relevant APC), the terms of reuse of such Open Access shall be governed by a Creative Commons licence – details of these licences and which [Creative Commons](#) licence will apply to this Work are set out in our licence referred to above.

Other than as permitted in any relevant BMJ Author's Self Archiving Policies, I confirm this Work has not been accepted for publication elsewhere, is not being considered for publication elsewhere and does not duplicate material already published. I confirm all authors consent to publication of this Work and authorise the granting of this licence.

1  
2  
3 **Protecting the Healthcare Workforce During COVID-19: A Qualitative Needs Assessment**  
4 **of Employee Occupational Health in the US National Veterans Health Administration**  
5  
6  
7  
8

9 Cati Brown-Johnson, PhD,<sup>1,2</sup> Matthew McCaa, MSOT,<sup>1</sup> Susan N. Giannitrapani, MSN, APRN,  
10 CCRN, NP,<sup>3</sup> Sara Singer, PhD MBA,<sup>1,2</sup> Karl A. Lorenz, MD, MSHS,<sup>1,2</sup> Elizabeth M. Yano, PhD,  
11 MSPH,<sup>4,5,6</sup> Wendy Thanassi, MD,<sup>7,2</sup> Cheyenne DeShields, BS,<sup>1,8</sup> Karleen F. Giannitrapani, PhD,  
12 MPH<sup>1,2</sup>  
13  
14  
15  
16

17  
18 <sup>1</sup> Center for Innovation to Implementation, VA Palo Alto Healthcare System, Palo Alto,  
19 California  
20

21  
22 <sup>2</sup> Primary Care and Population Health, Stanford University School of Medicine, Stanford,  
23 California  
24

25  
26 <sup>3</sup> Employee Occupational Health, Wilmington VA Medical Center, Wilmington, Delaware  
27

28  
29 <sup>4</sup> Center for the Study of Healthcare Innovation, Implementation & Policy, VA Greater  
30 LA Healthcare System, Los Angeles, California  
31

32  
33 <sup>5</sup> University of California Los Angeles, Fielding School of Public Health, Department of  
34 Health Policy and Management, Los Angeles, California  
35

36  
37 <sup>6</sup> UCLA Geffen School of Medicine, Department of Medicine, Los Angeles, California  
38

39  
40 <sup>7</sup> Employee Occupational Health, VA Palo Alto Healthcare System, Palo Alto, California  
41

42  
43 <sup>8</sup> Case Western Reserve University, Cleveland, Ohio  
44

45 Running title: COVID-19 Needs Assessment: Employee Occupational Health

46 Key words: Occupational and industrial medicine, COVID-19, Qualitative research  
47

48 Corresponding author:

49 Karleen Giannitrapani PhD MPH MA  
50 Center for Innovation to Implementation (Ci2i), VA Palo Alto Health Care System  
51 Stanford University School of Medicine, Palo Alto, CA  
52 Address: VA Palo Alto Health Care System,  
53 795 Willow Road (152 MPD), Menlo Park, CA 94025  
54 Email: Karleen@stanford.edu  
55 Phone: (650) 493-5000, dial 1, then 2, ext: 23725  
56  
57  
58  
59  
60

1  
2  
3 Fax: (650) 617-2736  
4

5 Abstract count: 246

6 Word count: 3499

7 References: 29

8 Tables: 2

9 Figures: 0

10 Appendices: 2  
11  
12  
13  
14  
15  
16  
17  
18  
19  
20  
21  
22  
23  
24  
25  
26  
27  
28  
29  
30  
31  
32  
33  
34  
35  
36  
37  
38  
39  
40  
41  
42  
43  
44  
45  
46  
47  
48  
49  
50  
51  
52  
53  
54  
55  
56  
57  
58  
59  
60

For peer review only

## Abstract

**Objective:** Early in the COVID-19 pandemic, Veterans Health Administration (VHA) Employee Occupational Health (EOH) providers were tasked with assuming a central role in coordinating employee COVID screening and clearance for duty, representing entirely novel EOH responsibilities. In a rapid qualitative needs assessment, we aimed to identify learnings from the field to support the vastly expanding role of EOH providers in a national healthcare system.

**Methods:** We employed rapid qualitative analysis of key informant interviews in a maximal variation sample on the parameters of job type, rural vs urban, and provider gender. We interviewed n=21 VHA EOH providers between July-December 2020. This sample represents 15 facilities from diverse regions of the United States (large, medium, and small facilities in the Mid-Atlantic; medium sites in the South; large facilities in the West and Pacific Northwest).

**Results:** Five interdependent needs included: 1) infrastructure to support employee population management, including tools that facilitate infection control measures such as contact tracing (e.g., employee-facing electronic health records, coordinated databases); 2) mechanisms for information-sharing across settings (e.g., VHA listserv), especially for changing policy and protocols; 3) sufficiently-resourced staffing using detailing to align EOH needs with human resource capital; 4) connected and resourced local and national leaders; 5) strategies to support health care worker mental health.

Our identified facilitators for EOH assuming new challenging and dynamically changes roles during COVID included: a) training or access to expertise; b) existing mechanisms for information-sharing; c) flexible and responsive staffing; and d) leveraging other institutional expertise not previously affiliated with EOH (e.g., chaplains to support bereavement).

**Conclusions:** Our needs assessment highlights local and system level barriers and facilitators of EOH assuming expanded roles during COVID. Integrating changes both within and across systems and with alignment of human capital will enable EOH preparedness for future challenges.

## Strengths and limitations of this study

- This is one of the first studies to evaluate the expanding role of employee occupational health (EOH) in response to the COVID-19 pandemic.
- The results of this study will help scale the dynamically changing job demands of EOH, improving preparedness in advance of future pandemics.
- Our analysis reveals needs of frontline EOH employees to keep health care workers (HCWs) safe from COVID-19 as an occupational hazard. Ensuring the safety of HCWs will help ensure the safety of the community at large.
- These lessons are generalizable both beyond the Veterans Health Administration and beyond COVID-19.
- Due to the condensed timeline we used rapid analytic techniques, which should surface similar themes to in-depth coding, but may not reveal deeper theoretical constructs.



## Introduction

In the United States, health care workers (HCWs) were heavily burdened by COVID-19 due to increased frontline demands and increased exposure to the coronavirus, at times representing up to 20% of cases reported statewide.[1,2] Beyond serious illness, HCWs were overworked during pandemic surges with worst-case impacts extending even to suicide.[3,4] While every aspect of healthcare delivery was impacted by the COVID-19 pandemic, supporting and protecting HCWs from COVID-19 as an occupational hazard must be of paramount ongoing importance, particularly as COVID-19 evolves and we manage other future pandemics.

Given the heightened vulnerability of HCWs during the pandemic, employee occupational health (EOH) providers were crucial in ensuring the safety of HCWs and thus the continuous delivery of health care. As of 2021, the US Veterans Health Administration (VHA) EOH assumes responsibility for the “safety and health” of over half-million HCWs, trainees, and volunteers.[5] Representing a national healthcare system, the VHA serves over 9 million veterans, with 10,000 in Community Living Centers, VHA nursing homes vulnerable to COVID-19.[5,6] Furthermore, VHA comprises 1,255 healthcare facilities and employs at least 322,030 full-time HCWs,[5] the majority of whom fall in the OSHA very high risk category for SARS-CoV-2 transmission.[7] VHA additionally interfaces with more than 73,000 active volunteers, 15,000 academic faculty, and 127,000 medical trainees.[5]

While VHA EOH has always been responsible for protecting this breadth of employees from workplace hazards, the COVID-19 pandemic required EOH to assume novel roles in managing the spread of infectious disease and to adapt as COVID-19 guidelines rapidly change. On March 15, 2020, the US Deputy Under Secretary for Health for Operations and Management circulated guidance allowing asymptomatic HCWs exposed to COVID-19 to continue to work after consulting EOH and requiring HCWs to report to EOH if symptoms appeared at work, tasking EOH with a central role in COVID management.[8] After that announcement, VHA EOH policies surrounding COVID-19 continuously evolved; online media and VHA forums suggest frontline clinicians struggled to keep up with emerging COVID recommendations.[9] Other challenges stemmed from national PPE shortages, which resulted in social media cries from HCWs to “#GetMePPE.”[9] Similarly, VHA EOH was not consistently equipped with appropriate PPE at nationwide facilities,[10] creating even more difficulties for EOH to fulfill new roles.

Our study leverages the perspectives of EOH to assess the barriers to and facilitators of EOH role expansion on the frontlines of supporting HCWs. In seeking to understand how best to support their expanding role, recent EOH publications on COVID have relied on expert opinion[11] and literature review,[12] as well as a growing number of qualitative reports.[13,14] Major themes from the literature include potential negative impacts of employee anxiety about COVID[15] and downstream impacts of telework such as social isolation or physical/ergonomic issues.[12] EOH healthcare literature reinforces these more general predictions of anxiety (especially related to burnout), and has additionally highlighted risk factors surrounding overwork (e.g., documenting requirements for electronic health records) and the potential protective impact of positive leadership.[16]

We undertook a rapid needs assessment for EOH as they assumed new and dynamically changing roles during COVID-19. Understanding needs and facilitating role readiness continues to be particularly critical as understanding about COVID-19 changes, guidance evolves, and we prepare for future healthcare disasters.

## Methods

1  
2  
3 Approach: We conducted 21 key informant qualitative interviews with EOH providers using a  
4 purposive sampling approach[17] seeking variation on the parameters of provider type (lead  
5 providers - MD/DO, mid-level providers - NP/PA, RNs), setting (size, rural/urban, and  
6 geographic region), and provider gender to represent a wide experience of EOH from this  
7 national health system (see Table 1).  
8

9  
10 Our qualitative research team (CBJ, MM, KG) developed the interview guide with input from two  
11 EOH subject matter experts (WT - Physician, SG - nurse practitioner). The research advisory  
12 team (SS, KL, EY) reviewed interview questions and procedures. The interview protocol  
13 addressed factors that could support or undermine readiness of EOH providers for COVID-19  
14 expanded roles, notably documentation, reporting, staffing, etc. (see Appendix A for interview  
15 protocol). In our purposive sample we used a snowball approach[17] starting from subject  
16 matter experts and attended to sample variation to capitalize on diverse perspectives.  
17

18 We sent potential participants an email including a study information sheet inviting them to  
19 interview, followed up by email twice, and scheduled interviews with email respondents. During  
20 the phone interviews conducted by PhD trained qualitative Research Scientist (CBJ),  
21 investigators (CBJ, MM) obtained consent for audio recording. We captured notes during  
22 interviews for rapid analysis and created verbatim transcripts from audio recordings.  
23

24 Analysis: We used standard qualitative methods, including rapid content analysis[18,19] and  
25 member-checking.[20] Within the VHA, rapid qualitative approaches have successfully been  
26 used to provide real-time insights backed by high-quality research methods.[19] Indeed, a VHA  
27 comparison of rapid vs. in-depth qualitative methods found the analyses to be consistent.[21]  
28

29  
30 Step 1: Templated case summaries and team debriefing discussion to create initial themes. Per  
31 rapid qualitative analysis methods, we created templated case summaries for each interview  
32 which were reviewed by at least two team members (CBJ and KG or N) and discussed during  
33 weekly debriefing calls with the research team.[18] Initial themes were derived from these  
34 templated case summaries and debriefing calls (conducted with entire co-author research  
35 team).  
36

37 Step 2: Creation and circulation of interim report for feedback (Lightning Report and modified  
38 member check). We used a Lightning Report approach - a rapid qualitative actionable product  
39 meant for wide distribution[18] - to create a preliminary report based on themes from case  
40 summaries and post-interview debriefing calls once we had collected half of the data sample (2  
41 months from first interview, n=10; see Appendix B for interim report). We circulated this  
42 Lightning Report to study advisors, VHA EOH central leadership, and participants for feedback,  
43 constituting a modified Synthesized Member Check.[20]  
44

45 Step 3: Integration of member check feedback and additional interviews for thematic saturation.  
46 Informed by EOH leader feedback and Step 1's templated case summaries and team debriefing  
47 for the additional subsequent interviews (n=11), CBJ and KG formalized a provisional final  
48 theme list. This theme list was reviewed with research advisors and subject matter experts and  
49 iteratively modified to five themes representing needs with theme definitions and examples.  
50 Mental health needs emerged as a new theme in Step 3, originating from templated case  
51 studies of the additional interviews.  
52

53  
54 Step 4: Verification/query of themes with final transcripts. CD transcribed interviews and  
55 identified exemplary quotes from transcripts to represent the major themes. NS and CBJ also  
56 reviewed transcriptions to confirm/disconfirm emergent themes.  
57

## Results

We invited 95 potential participants and conducted 21 interviews with EOH providers (response rate 22%). Interviews with MD/DO (n=10), NP/PA (n=8), and RN (n=3) participants were 30-60 minutes between July and December 2020. This sample represented 15 diverse VHA facilities from varied regions of the country, specifically large (>4000 employees), medium (2000>4000 employees), and small (<2000 employees) facilities in the Mid-Atlantic and Northeast; medium and large sites in South and Southwest; large facilities in the West and Pacific Northwest (see Table 1 for sample demographics).

We report needs in five themes (see Table 2 for exemplary quotes of each theme) organized around facilitators and barriers. Needs occurred at both in terms of systems and people. Systems needs included: 1) infrastructure to support population management locally and nationally and 2) mechanisms for information-sharing across the national system. People/human resources needs included: 3) sufficiently resourced staffing through detailing at the local level and 4) connected and resourced local and national leaders. A final theme around 5) mental health needs crossed both systems and people domains.

### *Theme 1. Infrastructure to support employee population management*

Across sites, respondents mentioned system needs locally and nationally (at both the micro and macro level) around population/infection management and tracking. Employee population management needs revolved around tools and mechanisms - for instance employee-facing EHR or coordinated spreadsheet databases - that could prioritize employee privacy while facilitating infection control measures such as contact tracing. Infrastructure facilitators were tools (EHR) and previous experience; barriers were lack of tools and lack of communication/coordination.

Facilitators. Facilitators for population management included creation of tools and previous EOH provider experience with database management (e.g., flu vaccination) and infection disease outbreaks. At a local (micro) level, independent VHA facilities created excel spreadsheets to track employee testing; these in-house solutions were important for reporting the volume of employees served. In October 2020, VHA instituted an employee EHR at the national (macro) level, but some EOH providers perceived it as "too little, too late... lack of cohesive connective EHR keeps people from optimal clinical care."(MD) In contrast, facilitators included previous experience with infectious disease outbreaks, training in public health management, and incident command system training. One site reporting successful tracking and management shared that the "first thing I did was make a centralized database... [but this was] a personal clinical decision."(RN)

Barriers. Barriers for population management included local lack of EHR for EOH as well as previous national cutbacks to EOH tracking. Lack of communication at some sites was also a barrier.

A major barrier for supporting population management was the lack of electronic health record (EHR) tools. However, EOH providers suggested employee population management infrastructure needs that encompassed much more than EHR. These needs also include: additional clinical space that could adequately address limit cross-contamination for persons under investigation (PUI); support opportunities for innovation such as the use of QR code readers for testing and COVID vaccination; and integrated backend infrastructure with worker compensation programs. Participants also cited lack of resources and recent cut-backs in EOH

1  
2  
3 as major barriers to better population management. For instance, the EHR instituted in October  
4 was a new version of an EHR system that had existed some years earlier as version “1.0” but  
5 had been dropped during a budget cut.  
6

7 Finally, lack of communication/consultation was also a barrier at some sites for population  
8 management. Locally, EOH requested being consulted when sites set up new systems to  
9 manage COVID. In one worst-case scenario, no one consulted EOH in the set-up of summer  
10 outside COVID testing. As a result, “no one did risk assessment for heat stroke [in a parking lot]  
11 and there were no measures for shade... [They were] testing patients in plastic lawn chairs –  
12 unsafe for employees.”(MD)  
13

### 14 *Theme 2. Mechanisms for information-sharing across settings*

15 Providers reflected a strong need for information-sharing within and across VAs. Facilitators to  
16 information flow included access to external information sources and experts, as well as an  
17 existing all-VA-EOH listserv. Barriers to information-sharing included the unmoderated status of  
18 the listserv and the high volume of new information.  
19

20  
21 Facilitators. Facilitators for information included external information sources, such as the US  
22 Centers for Disease Control (CDC) website, and even more broadly the internet, which  
23 supported information flow: “...how I learned more and [tracked] the movement of the  
24 pandemic... [I] went to bed reading the CDC.”(NP) Outside of state-sponsored information  
25 channels, strong connections with academic medicine facilitated information sharing. Providers  
26 reported benefitting from “daily huddles with [academic infectious disease providers when the]  
27 knowledge base [was] exploding.”(MD) A minority of providers reported closely reading and  
28 reviewing the VA’s Guidebook for Employee Health, which is 600 pages, but there was  
29 evidence that this resource was underutilized: “questions on [the listserv] show that people don’t  
30 use Guidebook.”(MD)  
31

32  
33 A listserv accessible to all VHA EOH was a major facilitator for information sharing. Many saw  
34 this peer-led listserv to be “a big advantage.”(RN) Providers reported the listserv, if adequately  
35 moderated by allocated experts, could support information-sharing: “ask a question [on the  
36 listserv], [experts] give the instruction... This is what we should be doing.”(MD) Even in its  
37 unmoderated state in 2020, without the listserv some reported, “we would all probably quit...  
38 [the listserv is] critical.”(NP)  
39

40 Barriers. Barriers to information-sharing revolved around the extremely high volume of new  
41 information about COVID and limitations of an unmoderated listserv. Due to the inexperience of  
42 temporary or untrained staff, the listserv could be perceived by more senior providers as  
43 “extremely frustrating... every two weeks someone is asking that [same] question [due to]  
44 revolving door [staffing].”(MD) Indeed, some providers reflected a broader sense of dis cohesive  
45 information-sharing due to the listserv: “Questions running rampant on the forum, there’s no  
46 control.”(NP)  
47

### 48 *Theme 3. Sufficiently resourced staffing through detailing and cross-training*

49 Not surprisingly, EOH providers reported that people, time, and skills were needed to  
50 adequately resource EOH (e.g., sufficient FTE per HCW population) in the local site micro-  
51 environment. Alignment of human resource capital with EOH workforce needs was reported to  
52 facilitate new role requirements and protect the EOH workforce; lack of trained and consistent  
53 staff locally was a major barrier.  
54  
55  
56  
57  
58  
59  
60

1  
2  
3 Facilitators. Additional staffing facilitators included creating standard EOH staffing ratios per  
4 employee (FTE), coverage/cross-training for flexible scale-up and scale-down, and alignment  
5 with services who could cover or detailed to EOH when needed. Furthermore, even with  
6 adequate people on hand, “the biggest thing we wanted... is cross-train[ing]” in areas vital to  
7 population health: call center management, testing, follow-up, and positive case  
8 management.(RN)  
9

10  
11 Barriers. For many EOH providers, a principle barrier to fulfilling EOH’s new responsibilities was  
12 lack of staffing. Providers reported inconsistent staffing during the COVID crisis: “they would  
13 give us staff for only certain days and certain times.” Additionally, staffing needs doubled or  
14 tripled during surges, but numerous sites reported that training was lacking: these “temporary  
15 folks who were detailed [were] slowly being pulled back into their own units,”(NP) representing a  
16 major risk as the US met the winter COVID surge. EOH providers wanted to be part of the  
17 conversation about staffing needs as they felt their site VHA executives might not always  
18 comprehend the scope of their expanded role or demands on their time.  
19

20  
21 EOH providers were also put in the position of managing employees’ fear of COVID. Additional  
22 staffing was one strategy used to manage this employee anxiety. Multiple providers reported  
23 staff coming in early, staying late, and working weekends to return calls: “I put myself in their  
24 position. How would I feel [with no information]... My job is to protect them.”(NP) Another  
25 provider ratified spending extra hours at work to return calls, “People get so scared.”(NP)  
26

#### 27 *Theme 4. Connected and resourced local and national EOH leaders*

28 Providers emphasized the importance of having coherent guidance from national EOH leaders  
29 and interdisciplinary facility level executives. Successes at the local level were perceived as  
30 facilitated by interdisciplinary connections and inclusion in “incident command.” Lack of  
31 resources in national leadership was seen as a barrier.  
32

33 Facilitators. Local leaders (at the micro level) who were well-networked were able to connect  
34 with crisis response “incident command” structures, facilitating better EOH support for HCWs.  
35 These incident command structures generally included site leaders and daily meetings/huddles  
36 within EOH. COVID-19 teams such as this were appropriately reported as focusing on the  
37 “veterans’ perspective.”(NP) EOH providers were perceived to be the “only” role at this level of  
38 local leaders representing employee interests, needs, and concerns. Providers perceived  
39 specific staff at national VHA EOH leadership to be “excellent...extremely dedicated,” but the  
40 positions were understaffed compared to the amount of work to be done: “There is just one of  
41 them [1.0 FTE].”(MD) One recommended approach to effective centralized leadership included  
42 having 2-3 full time experts who could “travel to places that need experts...like  
43 consultants.”(MD)  
44

45 Barriers. By contrast, the perception of a barrier with respect to lack of adequate resources for  
46 leaders at the national level may have contributed to the sense that “there isn’t a coherent union  
47 of all [the VHA centers across the country].”(MD) VHA macro-level EOH leadership was  
48 perceived to need “more staffing, more presence, structure that helps with outreach to all VAs...  
49 Boots on the ground.”(MD) EOH providers wanted national level leaders to direct with authority  
50 during Covid-19, “What you’d like is occupational health [central office leaders] coming out with  
51 rules to say ‘This is what we need to do’.”(MD)  
52  
53

#### 54 *Theme 5. Strategies to address HCW mental health concerns*

55 EOH providers, due to their role as a central point of contact with employees with a health-  
56 related workplace concern, found themselves in need of strategies to support HCW mental  
57  
58  
59  
60

1  
2  
3 health during COVID. Both overwork and experiencing trauma (e.g., excessive patient deaths or  
4 the death of a co-worker) came up as examples negatively impacted employee mental health.  
5 Outside of COVID contagion, EOH providers recognized the impact on HCW mental health as  
6 the major impact of the pandemic on employee health: “Anxiety is the barrier...Questions aren’t  
7 just about work – ‘what about my toddlers and daycare and my 90-year-old grandmother’.”(MD)  
8 Incorporating external help (eg. employee assistance programs or non-EOH provider help  
9 including chaplains) was seen as a facilitator to supporting HCW mental health. Barriers to  
10 accessing mental health support related to the volume of HCW need and lack of local support  
11 for EOH. Additionally, EOH providers at multiple sites described themselves as on the brink of  
12 burnout due to exceptional and stressful workplace demands.  
13

14  
15 Facilitators. In one site, where nearly 50% of older patients had died in a COVID  
16 surge, HCWs were grieving, distressed, and bereaved. Facing the scale of this loss, local EOH  
17 leadership incorporated chaplain assistance in addition to referring HCW to EAPs. Looking to  
18 the future, one provider expressed that their EOH group knew “to expect tsunami of depression,  
19 anxiety, etc. from COVID” based on reading reports coming out of Japan, but this provider still  
20 did not have specific approaches to address this need locally.(NP)  
21

22  
23 Some sites noted referring employees to EAPs for issues like “tensions at home” but perceived  
24 that “mental health support is still a [gap].”(MD) EOH attempted a wide range of strategies to  
25 support mental health for their employees, from referring HCWs to overwhelmed EAPs to  
26 system solutions such as facilitating easy access to VA-issued laptops for employees to be able  
27 to work from home while on quarantine.  
28

29 Barriers. EOH provider burnout and distress was a mental health-related barrier for better EOH  
30 care. EOH providers consistently reported that they themselves were overwhelmed, and some  
31 reported nearing burnout. Multiple providers reported considering quitting - “I got pretty close to  
32 resigning”(MD) - due to the volume of work and positive cases. Furthermore, brittle VHA  
33 protocols not related to COVID could plague EOH providers and contribute to burnout and  
34 distress. For example, in one instance, an EOH provider was repeatedly asked to justify  
35 overtime hours, even as their office was reduced to a single staff member managing >3000  
36 employees.  
37

## 38 Discussion

39 Understanding how best to rapidly expand roles and scale the dynamically changing job  
40 demands of EOH during an infectious outbreak is needed in advance of future pandemics, and  
41 disaster preparedness is particularly important for this setting, the US Veterans Health  
42 Administration (VHA), which identifies preparedness as its “Fourth Mission”.<sup>[22]</sup> We took on this  
43 needs assessment when guidance in March 2020 from VHA national leadership forced EOH to  
44 the front and center of the organization's response.<sup>[8]</sup> We were particularly concerned that in  
45 order to minimize staffing shortages, healthcare organizations might choose to encourage  
46 potentially contagious but asymptomatic health personnel to work. Having EOH providers  
47 navigate this reality was complex, nuanced, and something for which they had not prepared.  
48 EOH needed to learn, adapt, and create new processes on the fly in a high-stakes setting.  
49

50  
51 Our identified facilitators of EOH assuming new challenging and dynamically changes roles  
52 during COVID included: a) training or access to expertise (in infectious diseases, public health  
53 management, and disaster management); b) existing mechanisms for information-sharing  
54 (national reports from CDC and a VA-specific listserv); c) flexible and responsive staffing; and d)  
55 leveraging other institutional expertise not previously affiliated with EOH (e.g., chaplains to  
56 support mental health and bereavement).  
57

1  
2  
3  
4 In this qualitative systematic account of national EOH provider experiences, we found needs at  
5 the local and national level centered on systems/structure and people, similar to other  
6 international reports that identified preparedness, structures, and physical/mental health as  
7 primary challenges.[14] Our study found primary barriers to EOH assuming expanded roles  
8 were related to funding for systems (e.g., EHR implementation) and people including limited  
9 staffing and leadership at both local and national levels.  
10

11 In particular, the need for mental health and psychosocial support, identified in our fifth theme,  
12 has been documented to be a robust challenge for HCW internationally.[13,23–25] Other  
13 explorations of EOH needs during COVID also identified EOH issues faced by medical health  
14 workers, and overlapped with this study in terms of identifying work stressors and “the need for  
15 supportive supervision” as major issues.[26] Support for HCW mental health may be facilitated  
16 by organizational support and underpin the psychological safety needed to nimbly respond to  
17 disasters.[27] Rounding out the need for mental health support, recent reviews have identified  
18 frontline and non-physician HCWs as having greater mental health needs during the COVID-19  
19 pandemic.[24]  
20  
21

22 As COVID persists and other pandemics emerge, the role of employee occupational health  
23 providers in national healthcare systems should not be under-valued. Though the role of EOH  
24 may be underestimated or unconsidered in healthcare settings, it is critical to the safety of the  
25 healthcare workforce. Further, EOH’s potential role in minimizing COVID spread among HCWs  
26 is directly relevant to the safety of employees and their families, vulnerable patients, and the  
27 community at large.  
28

29 *Promising practices beyond VA.* Despite the fluctuation of recommendations from some national  
30 agencies (e.g., CDC),[28] our EOH providers reported relying heavily on external agency  
31 standards to inform their local response. Ideally, national leadership could provide enough  
32 guidance that in times of crisis individual sites are not learning by themselves; inter-site  
33 communication gave EOH providers a community to engage in shared learning and accelerate  
34 spread of learnings, processes, and policy adaptations. Thinking beyond acute disasters, a  
35 high-functioning national EOH community in an integrated healthcare system could event  
36 potentially positively address long-standing health and civil wellness issues (e.g., racism and  
37 racial inequality).  
38  
39

40 *Promising practices beyond COVID-19.* These lessons from the COVID-19 pandemic critically  
41 inform future EOH preparedness. Past healthcare crises have pointed to the demand for  
42 decisive leadership, collaborative networks, and employee monitoring systems,[29] echoing  
43 the needs of VHA EOH. Although EOH providers felt VHA piloted the employee EHR too late in  
44 response to COVID-19, this EHR system will likely prove useful in the future. In the wake of  
45 increasing epidemics and natural disasters, it is crucial that we recognize both the immediate  
46 and long-term benefits of equipping EOH with the tools to expand their role in managing HCW  
47 safety.  
48

49 *Limitations.* To rapidly produce early insights for the field, we leveraged a rapid qualitative  
50 analytic approach instead of more in-depth qualitative methods. This approach optimized  
51 dissemination of frontline provider insights in preparation for the COVID-12 vaccine roll-out in  
52 December 2020. Previous reports have shown that rapid and in-depth qualitative analysis can  
53 produce the same results,[21] but we may have missed important theoretical insights as a result  
54 of rapid analysis, which we hope to remedy with future in-depth theoretical analyses. We were  
55 ultimately able to produce early results in just two months, and some recommendations  
56  
57  
58  
59  
60

1  
2  
3 originating from our participants are already being enacted by VA. Secondly, our purposive  
4 snowball sample is a good snapshot of the experiences of EOH in the VA, but ideally we might  
5 have talked to EOH providers from each major site, since pandemic progression varied greatly  
6 from location to location, even with the US.  
7

8 *Conclusion.* In our highly-networked world, employee occupational health (EOH) will  
9 consistently be at the forefront of disaster management and will continue to be central in future  
10 pandemics. A systematic focus on EOH in healthcare settings will be a strong step towards truly  
11 honoring the effort HCWs put forward in the COVID-19 pandemic, keeping them safe in their  
12 places of work. As one of our participants highlighted, “Employees are the key asset, [but]  
13 without [EOH] occupational health professionals... we are not able to support and optimize the  
14 health of employees.”  
15  
16  
17  
18  
19  
20  
21  
22  
23  
24  
25  
26  
27  
28  
29  
30  
31  
32  
33  
34  
35  
36  
37  
38  
39  
40  
41  
42  
43  
44  
45  
46  
47  
48  
49  
50  
51  
52  
53  
54  
55  
56  
57  
58  
59  
60



1  
2  
3 Acknowledgments: We would like to thank all the providers who participated in interviews and  
4 our partnership with US Veterans Health Administration (VA) occupational health leadership.  
5 Natalie Connell should be acknowledged for her help with manuscript preparation. The contents  
6 of this manuscript do not represent the views of VA or the United States Government. This  
7 study was reviewed and approved by the Stanford and VHA IRB, #56617; participants gave  
8 informed consent before participating. This work was supported by COVID-19 Pilot Project  
9 Award # C19 20-207 (PI Giannitrapani) and Senior Research Career Scientist Award RCS 05-  
10 195 (PI Yano) from the United States (U.S.) Department of Veterans Affairs, Health Services  
11 Research and Development Service.  
12

13  
14 This material is the result of work supported with resources and the use of facilities at the VA  
15 Palo Alto Health Care System, Palo Alto, California. Cati Brown-Johnson is at the Center for  
16 Innovation to Implementation, VA Palo Alto Healthcare System, Palo Alto, California. Matt  
17 McCaa is at the Center for Innovation to Implementation, VA Palo Alto Healthcare System, Palo  
18 Alto, California. Susan N. Giannitrapani is in Employee Occupational Health, Wilmington VA  
19 Medical Center, Wilmington, Delaware. Sara Singer is at the Center for Innovation to  
20 Implementation, VA Palo Alto Healthcare System, Palo Alto, California. Karl A. Lorenz is at the  
21 Center for Innovation to Implementation, VA Palo Alto Healthcare System, Palo Alto, California.  
22 Elizabeth M. Yano is at Center for the Study of Healthcare Innovation, Implementation & Policy,  
23 VA Greater LA Healthcare System, Los Angeles, California. Wendy Thanassi is at the  
24 Employee Occupational Health, VA Palo Alto Healthcare System, Palo Alto, California.  
25 Cheyenne DeShields is at the Center for Innovation to Implementation, VA Palo Alto Healthcare  
26 System, Palo Alto, California. Karleen Giannitrapani is a Core Investigator, Center for Innovation  
27 to Implementation, VA Palo Alto Healthcare System, Palo Alto, California.  
28

29  
30 Author contributions: KFG, SNG, and CBJ were responsible for the conception and design of  
31 this study. Research advisors, KAL, SS, and EMY helped CBJ, KFG, MM, and CD design the  
32 interview protocol. SNG and WT facilitated recruitment of EOH providers. CBJ and MM  
33 conducted data collection, and CD transcribed interviews and participated in analysis. CBJ and  
34 KFG drafted the manuscript, with substantial input and review from all authors. All authors  
35 approved the final manuscript.  
36

37  
38 COI: The authors have no COI to report. Wendy Thanassi and Susan Giannitrapani are VHA  
39 occupational health employees; they facilitated recruitment and commented on synthesized  
40 results.

41  
42 Patients and public involvement: Patients were not involved in this qualitative analysis exploring  
43 perspectives of EOH providers.

44  
45 Data sharing: De-identified data can be made available upon reasonable request.

46  
47 Funding sources: VA HSR&D C19 20-207 (PI Giannitrapani); VA HSR&D RCS 05-195 (PI  
48 Yano)  
49  
50  
51  
52  
53  
54  
55  
56  
57  
58  
59

1  
2  
3  
4  
5  
6  
7  
8  
9  
10  
11  
12  
13  
14  
15  
16  
17  
18  
19  
20  
21  
22  
23  
24  
25  
26  
27  
28  
29  
30  
31  
32  
33  
34  
35  
36  
37  
38  
39  
40  
41  
42  
43  
44  
45  
46  
47  
48  
49  
50  
51  
52  
53  
54  
55  
56  
57  
58  
59  
60

For peer review only

## References

- 1 Spencer J. Why we're tracking every US health worker who dies from coronavirus. The Guardian. 2020.<https://www.theguardian.com/us-news/2020/apr/15/why-were-tracking-every-us-health-worker-who-dies-from-coronavirus> (accessed 4 Dec 2020).
- 2 Kambhampati AK. COVID-19—Associated Hospitalizations Among Health Care Personnel. *Morbidity and Mortality Weekly Report* 2020;**69**. doi:10.15585/mmwr.mm6943e3
- 3 Gulati G, Kelly BD. Physician suicide and the COVID-19 pandemic. *Occup Med (Lond)* Published Online First: 4 June 2020. doi:10.1093/occmed/kqaa104
- 4 Danhauer SC, Files K, Freischlag JA. Physician Suicide—Reflections on Relevance and Resilience. *JAMA Surg* 2020;**155**:721–2. doi:10.1001/jamasurg.2020.1345
- 5 Veterans Health Administration. About VHA - Veterans Health Administration. 2019.<https://www.va.gov/health/aboutvha.asp> (accessed 4 Dec 2020).
- 6 U. S. Government Accountability Office. VA Nursing Home Care: VA Has Opportunities to Enhance Its Oversight and Provide More Comprehensive Information on Its Website. Published Online First: 2 August 2019.<https://www.gao.gov/products/GAO-19-428> (accessed 14 Dec 2020).
- 7 Occupational Safety and Health Administration. Worker Exposure Risk to COVID-19. 2020. <https://www.osha.gov/coronavirus> (accessed 17 Dec 2020).
- 8 Liberman S. Memorandum. Coronavirus (COVID019) Guidance for Work Recommendations for Asymptomatic Healthcare Personnel after Exposure to a COVID-19 Patient. U.S. Department of Veterans Affairs, Deputy Undersecretary for Health for Operations and Management 2020.
- 9 Padilla M. 'It Feels Like a War Zone': Doctors and Nurses Plead for Masks on Social Media. The New York Times. 2020.<https://www.nytimes.com/2020/03/19/us/hospitals-coronavirus-ppe-shortage.html> (accessed 14 Dec 2020).
- 10 US Department of Veterans Affairs, Veterans Health Administration. Veterans Health Administration (VHA) Coronavirus Disease 2019 (COVID-19) Response Report. 2020. <https://www.publichealth.va.gov/n-coronavirus/> (accessed 14 Dec 2020).
- 11 Sinclair RR, Allen T, Barber L, *et al*. Occupational Health Science in the Time of COVID-19: Now more than Ever. *Occup Health Sci* 2020;:1–22. doi:10.1007/s41542-020-00064-3
- 12 Bouziri H, Smith DRM, Descatha A, *et al*. Working from home in the time of COVID-19: how to best preserve occupational health? *Occup Environ Med* 2020;**77**:509–10. doi:10.1136/oemed-2020-106599
- 13 Roca J, Canet-Vélez O, Cemeli T, *et al*. Experiences, emotional responses, and coping skills of nursing students as auxiliary health workers during the peak COVID-19 pandemic: A qualitative study. *International Journal of Mental Health Nursing*;n/a. doi:10.1111/inm.12858

- 1  
2  
3 14 Jeleff M, Traugott M, Jirovsky-Platter E, *et al.* Occupational challenges of health care  
4 workers during the COVID-19 pandemic. A qualitative study. *medRxiv*  
5 2021;:2021.05.11.21257030. doi:10.1101/2021.05.11.21257030  
6
- 7 15 Trougakos JP, Chawla N, McCarthy JM. Working in a pandemic: Exploring the impact of  
8 COVID-19 health anxiety on work, family, and health outcomes. *Journal of Applied*  
9 *Psychology* 20200924;105:1234. doi:10.1037/apl0000739  
10
- 11 16 Buselli R, Baldanzi S, Corsi M, *et al.* Psychological Care of Health Workers during the  
12 COVID-19 Outbreak in Italy: Preliminary Report of an Occupational Health Department  
13 (AOUP) Responsible for Monitoring Hospital Staff Condition. *Sustainability* 2020;12:5039.  
14 doi:10.3390/su12125039  
15
- 16 17 Bernard HR. *Research methods in anthropology: qualitative and quantitative approaches.*  
17 4th ed. Lanham, MD: : AltaMira Press 2006.  
18
- 19 18 Brown-Johnson C, Safaeinili N, Zionts D, *et al.* The Stanford Lightning Report Method: A  
20 comparison of rapid qualitative synthesis results across four implementation evaluations.  
21 *Learn Health Syst* 2019;4. doi:https://doi.org/10.1002/lrh2.10210  
22
- 23 19 Hamilton AB, Brunner J, Cain C, *et al.* Engaging multilevel stakeholders in an  
24 implementation trial of evidence-based quality improvement in VA women's health primary  
25 care. *Behav Med Pract Policy Res* 2017;7:478–85. doi:10.1007/s13142-017-0501-5  
26
- 27 20 Birt L, Scott S, Cavers D, *et al.* Member Checking: A Tool to Enhance Trustworthiness or  
28 Merely a Nod to Validation? *Qualitative Health Research* Published Online First: 22 June  
29 2016. doi:10.1177/1049732316654870  
30
- 31 21 Gale RC, Wu J, Erhardt T, *et al.* Comparison of rapid vs in-depth qualitative analytic  
32 methods from a process evaluation of academic detailing in the Veterans Health  
33 Administration. *Implementation Science* 2019;14:11. doi:10.1186/s13012-019-0853-y  
34
- 35 22 Massarweh N, Itani K, Tsai T. Maximizing the US Department of Veterans Affairs' Reserve  
36 Role in National Health Care Emergency Preparedness—The Fourth Mission. *JAMA Surg*  
37 2020;155:913–4. doi:10.1001/jamasurg.2020.4153  
38
- 39 23 Chen Q, Liang M, Li Y, *et al.* Mental health care for medical staff in China during the  
40 COVID-19 outbreak. *The Lancet Psychiatry* 2020;7:e15–6. doi:10.1016/S2215-  
41 0366(20)30078-X  
42
- 43 24 Moitra M, Rahman M, Collins PY, *et al.* Mental health consequences for healthcare workers  
44 during the COVID-19 pandemic: a scoping review to draw lessons for LMICs. *Frontiers in*  
45 *psychiatry* 2021;12:22.  
46
- 47 25 Spoorthy MS, Pratapa SK, Mahant S. Mental health problems faced by healthcare workers  
48 due to the COVID-19 pandemic—A review. *Asian Journal of Psychiatry* 2020;51:102119.  
49 doi:10.1016/j.ajp.2020.102119  
50
- 51 26 Krystal JH, Alvarado J, Ball SA, *et al.* Mobilizing an institutional supportive response for  
52 healthcare workers and other staff in the context of COVID-19: The Yale experience.  
53 *General Hospital Psychiatry* 2020.  
54  
55  
56  
57  
58  
59

- 1  
2  
3 27 Lee H. Changes in workplace practices during the COVID-19 pandemic: the roles of  
4 emotion, psychological safety and organisation support. *Journal of Organizational*  
5 *Effectiveness: People and Performance* 2021;**8**:97–128. doi:10.1108/JOEPP-06-2020-0104  
6  
7 28 Benzian H, Johnston M, Stauf N, *et al.* Presenting or Spinning Facts? Deconstructing the  
8 U.S. Centers for Disease Control Statement on the Importance of Reopening Schools Under  
9 COVID-19. *Front Public Health* 2021;**9**. doi:10.3389/fpubh.2021.645229  
10  
11 29 Khan Y, O’Sullivan T, Brown A, *et al.* Public health emergency preparedness: a framework  
12 to promote resilience. *BMC Public Health* 2018;**18**:1344. doi:10.1186/s12889-018-6250-7  
13  
14  
15  
16  
17  
18  
19  
20  
21  
22  
23  
24  
25  
26  
27  
28  
29  
30  
31  
32  
33  
34  
35  
36  
37  
38  
39  
40  
41  
42  
43  
44  
45  
46  
47  
48  
49  
50  
51  
52  
53  
54  
55  
56  
57  
58  
59  
60

For peer review only

1  
2  
3 **Tables**  
4

5 Table 1. Respondent and site characteristics.  
6

7 **Providers (n=21)**

|                        |              |    |
|------------------------|--------------|----|
| 8 <b>Type</b>          |              |    |
| 9                      | NP/PA        | 8  |
| 10                     | RN           | 3  |
| 11 <b>Gender</b>       |              |    |
| 12                     | Women        | 14 |
| 13                     | Men          | 7  |
| 14                     |              |    |
| 15 <b>Site (n=15)</b>  |              |    |
| 16 <b>Location</b>     |              |    |
| 17                     | Northeast    | 5  |
| 18                     | Mid-Atlantic | 3  |
| 19                     | Midwest      | 2  |
| 20                     | South        | 1  |
| 21                     | Southwest    | 1  |
| 22                     | West         | 3  |
| 23 <b>Size</b>         |              |    |
| 24                     | Small        | 6  |
| 25                     | Mid          | 3  |
| 26                     | Large        | 6  |
| 27 <b>Rural/ Urban</b> |              |    |
| 28                     | Rural        | 4  |
| 29                     | Urban        | 11 |

30  
31  
32  
33  
34  
35  
36  
37  
38  
39  
40  
41  
42  
43  
44  
45  
46  
47  
48  
49  
50  
51  
52  
53  
54  
55  
56  
57  
58  
59  
60

Table 2. Need Statement with Exemplary Quotes

| Theme                                                             | Need Statement                                                                                                                                                                                                                                                                        | Exemplary Quotes                                                                                                                                                                                                                                                                                                                                                                                                                                                                                                                                | Intervention Examples                                                                                    |
|-------------------------------------------------------------------|---------------------------------------------------------------------------------------------------------------------------------------------------------------------------------------------------------------------------------------------------------------------------------------|-------------------------------------------------------------------------------------------------------------------------------------------------------------------------------------------------------------------------------------------------------------------------------------------------------------------------------------------------------------------------------------------------------------------------------------------------------------------------------------------------------------------------------------------------|----------------------------------------------------------------------------------------------------------|
| Theme 1: Infrastructure to support employee population management | EOH Providers reported “drowning” without a complete electronic health record for employees: “We need an electronic medical chart!” Without this EHR, contact tracing was perceived to be highly challenging: “any other corporation would have this – who works where and for whom.” | “There’s many, many things that an electronic medical record, specifically designed for employee health, would do for us... that would be a lot of the surveillance programs that we have to run [existing patient medical record] is of no use with respect to tracking flu vaccinations in employees, and so we have to set up separate databases for that. And databases are always a little messy. You know, accidents happen with databases, and data gets lost.” -MD                                                                      | <ul style="list-style-type: none"> <li>EHR for EOH (system and macro level)</li> </ul>                   |
| Theme 2: Mechanisms for information sharing across settings       | EOH Providers found themselves constantly “reinventing the wheel” and need a “more centralized clearing house for protocols” and systems to “lean” on.                                                                                                                                | <p>“And of all things the listserv has been a big advantage for that because the—they can ask a question and anybody can answer those questions, and online is very— whenever they ask a question, give the instruction that says what we’re doing so that it’s very clear this is what this instruction says we should be doing. And then we’d standardize it across the way and through the entire VA.”-MD</p> <p>“So I use our EOC, so our emergency operations command was brought forth from the incident command system, and that has</p> | <ul style="list-style-type: none"> <li>Listserv moderated by experts (system and macro level)</li> </ul> |

|                                                                   |                                                                                                                                                                                                                                        |                                                                                                                                                                                                                                                                                                                                                                                                                                                                                                                                                                                                                                                                      |                                                                                                            |
|-------------------------------------------------------------------|----------------------------------------------------------------------------------------------------------------------------------------------------------------------------------------------------------------------------------------|----------------------------------------------------------------------------------------------------------------------------------------------------------------------------------------------------------------------------------------------------------------------------------------------------------------------------------------------------------------------------------------------------------------------------------------------------------------------------------------------------------------------------------------------------------------------------------------------------------------------------------------------------------------------|------------------------------------------------------------------------------------------------------------|
|                                                                   |                                                                                                                                                                                                                                        | <p>been the biggest help as far as knowing policy changes because as a nurse, I don't often get the memorandums whenever they're sent, and I don't often get all of the nursing updates from a national level that are sent. And so I lean heavily on EOC and infection prevention. We're really close with our infection prevention team because we work so hard with them over this COVID that they give us the updates that I don't always get, and they help us formulate a plan."-RN</p>                                                                                                                                                                        |                                                                                                            |
| <p>Theme 3: Sufficiently resourced staffing through detailing</p> | <p>EOH providers felt challenged by the expectation that EOH "maintain EOH duties [while] still having everything else to do". Some providers believed: "We still need more people but it's not a priority [to the organization]."</p> | <p>"We've been putting— staff has been putting in a lot of overtime because we don't have sufficient staff to take on all the tasks and keep people at their 40 hour weeks. We are tapping into, as I said, the labor pool, but that unfortunately turns out to be transient, and while they may be very competent, we train them and then they have to go back."-MD</p> <p>"The problem with the facility occ health...is when a facility does staffing, who do they need staffing for? Veteran Care. Occ health is an ancillary. It's when we have staff left over, enough....we'll just have staffing come there [to EOH]. It's not a priority, you know?"-MD</p> | <ul style="list-style-type: none"> <li>• Cross-trained staff (people, and macro or micro level)</li> </ul> |



1  
2  
3  
4  
5  
6  
7  
8  
9  
10  
11  
12  
13  
14  
15  
16  
17  
18  
19  
20  
21  
22  
23  
24  
25  
26  
27  
28  
29  
30  
31  
32  
33  
34  
35  
36  
37  
38  
39  
40  
41  
42  
43  
44  
45  
46  
47  
48  
49  
50  
51  
52  
53  
54  
55  
56  
57  
58  
59  
60

|                                                                                 |                                                                                                                                                                                                                                                                                                                              |                                                                                                                                                                                                                                                                                                                                                                                                                                                                                                                                                                                                                                                                                                                                                                                                                                                                                                                                                                                                                                                                                                                                                            |                                                                                                                               |
|---------------------------------------------------------------------------------|------------------------------------------------------------------------------------------------------------------------------------------------------------------------------------------------------------------------------------------------------------------------------------------------------------------------------|------------------------------------------------------------------------------------------------------------------------------------------------------------------------------------------------------------------------------------------------------------------------------------------------------------------------------------------------------------------------------------------------------------------------------------------------------------------------------------------------------------------------------------------------------------------------------------------------------------------------------------------------------------------------------------------------------------------------------------------------------------------------------------------------------------------------------------------------------------------------------------------------------------------------------------------------------------------------------------------------------------------------------------------------------------------------------------------------------------------------------------------------------------|-------------------------------------------------------------------------------------------------------------------------------|
| <p>Theme 4: Connected, resourced, and supportive local and national leaders</p> | <p>“The leadership we need is experienced MD—an MD in leadership who is experienced with occupational health, with mass testing, with policy, with infectious disease, and that leadership should be several people deep. Because one person cannot handle 400,000 employees and all the policies that are around that.”</p> | <p>“I was the only person there [in EOH clinic] and I was trying to have a conversation with him [local site leadership] and there were patients coming in to see me, so the leadership team, you know, got a first-hand look and said ‘hey, she needs some help in here’... by then we’d just seen the volume of, or the increase in volume of workload, that I had in employee health. And immediately they put together a plan to try to get me some support to help handle and manage the calls and manage and navigate through COVID-19.”-NP</p> <p>“If you look at occ health being the VA, it is pretty much fractured into the local levels. If you go from one VHA to another VHA facility, the programs will be different. There is no central leadership guidance that maintains that control or that maintains enough standards. And especially to say, “are you following what we decided we’re going to do?”-MD</p> <p>“COVID doesn’t live in a vacuum. It lives in the setting of our already busy full-time jobs. So, leadership needs more people and more experience and they should be highly trained. And we don’t have that.” -MD</p> | <ul style="list-style-type: none"> <li>• Additional FTE for national leadership positions (people and macro level)</li> </ul> |
|---------------------------------------------------------------------------------|------------------------------------------------------------------------------------------------------------------------------------------------------------------------------------------------------------------------------------------------------------------------------------------------------------------------------|------------------------------------------------------------------------------------------------------------------------------------------------------------------------------------------------------------------------------------------------------------------------------------------------------------------------------------------------------------------------------------------------------------------------------------------------------------------------------------------------------------------------------------------------------------------------------------------------------------------------------------------------------------------------------------------------------------------------------------------------------------------------------------------------------------------------------------------------------------------------------------------------------------------------------------------------------------------------------------------------------------------------------------------------------------------------------------------------------------------------------------------------------------|-------------------------------------------------------------------------------------------------------------------------------|

|                                                                                   |                                                                                                                   |                                                                                                                                                                                                                                                                                                                                                                                                                                                                                                                                                                                                                                                                                                                                                                                                                                                                                                                                                                                                                                                                                                                                                                                                                                  |                                                                                                                                                                                                      |
|-----------------------------------------------------------------------------------|-------------------------------------------------------------------------------------------------------------------|----------------------------------------------------------------------------------------------------------------------------------------------------------------------------------------------------------------------------------------------------------------------------------------------------------------------------------------------------------------------------------------------------------------------------------------------------------------------------------------------------------------------------------------------------------------------------------------------------------------------------------------------------------------------------------------------------------------------------------------------------------------------------------------------------------------------------------------------------------------------------------------------------------------------------------------------------------------------------------------------------------------------------------------------------------------------------------------------------------------------------------------------------------------------------------------------------------------------------------|------------------------------------------------------------------------------------------------------------------------------------------------------------------------------------------------------|
| <p>Theme 5: Strategies to address HCW and EOH provider mental health concerns</p> | <p>“Mental health support is still a gap” for both frontline healthcare workers and EOH providers themselves.</p> | <p>“The first week in July we had 92 employees with confirmed positive. Those are confirmed positive. We had over 150 at one time I think, employees that were out with symptoms consistent with COVID or high-risk exposures at home or something. So that, that’s a pretty big increase. I honestly, I got burnt out. The nurse practitioners and I got burnt out. I got pretty close to resigning because it wasn’t working very well. But we did talk to people, people started understanding, particularly as the numbers went up. And we got some detailed help. So we brought in some nursing staff, administrative staff, PSAs, and some of the comp and pen docs came over.”-MD</p> <p>“Definitely the anxiety is the barrier. If people freak out, you know, it’s kind of like, they’re like ‘well, the face shield doesn’t cover the whole face.’ Well, okay... You covered your mucus membranes, right? So, like what’s the problem? There’s no problem. But then I’m kind of telling you that; I don’t tell them that because, again, like I said, it’s a little bit like this thing where if we have so much exposure that we kind of get a little bit desensitized, you know, but other people might not.”-MD</p> | <ul style="list-style-type: none"> <li>External EAPs, so that HCWs do not have to access mental health care from in-house colleagues (System and people, possible micro and macro levels)</li> </ul> |
|-----------------------------------------------------------------------------------|-------------------------------------------------------------------------------------------------------------------|----------------------------------------------------------------------------------------------------------------------------------------------------------------------------------------------------------------------------------------------------------------------------------------------------------------------------------------------------------------------------------------------------------------------------------------------------------------------------------------------------------------------------------------------------------------------------------------------------------------------------------------------------------------------------------------------------------------------------------------------------------------------------------------------------------------------------------------------------------------------------------------------------------------------------------------------------------------------------------------------------------------------------------------------------------------------------------------------------------------------------------------------------------------------------------------------------------------------------------|------------------------------------------------------------------------------------------------------------------------------------------------------------------------------------------------------|

1  
2  
3  
4  
5  
6  
7  
8  
9  
10  
11  
12  
13  
14  
15  
16  
17  
18  
19  
20  
21  
22  
23  
24  
25  
26  
27  
28  
29  
30  
31  
32  
33  
34  
35  
36  
37  
38  
39  
40  
41  
42  
43  
44  
45  
46  
47  
48  
49  
50  
51  
52  
53  
54  
55  
56  
57  
58  
59  
60

For peer review only

**INTERVIEW GUIDE****OCCUPATIONAL HEALTH'S ROLE IN COVID – NEEDS ASSESSMENT AND LESSONS LEARNED INTERVIEW GUIDE****BACKGROUND**

What is your role?

*[Appreciative Inquiry]*

What did you like best about your job prior to COVID? Why did you go into occupational health?

**CHANGE IN PRACTICES WITH COVID**

*[Forensic experiential trauma interview]*

This has been a completely unexpected and transformative time. There was a VA policy announced in middle of March (the 15<sup>th</sup>) that put Occupational Health in the middle of employee healthcare and safety. Tell me about your experience since hearing about this policy.

What did you do first?

What would you have wanted to do differently?

**IDEAL**

What is your ideal approach to managing Occupational Health now that we have some experience with a global pandemic?

What helps you move towards this ideal?

What barriers keep you from this ideal?

**INFORMATION**

What resources do you use to keep up-to-date about new policies?

Are you aware of the forum?

Where do you get your information about COVID?

How about the VA's response to it nationally? and locally?

How useful do you find these resources?

How have you been communicating new policies with stakeholders?

How are you integrating emerging evidence into practice?

**POLICIES**

What policies have you been able to use or adapt?

What has been your process for adapting these policies?

What additional policies are needed at the national, VISN, and local levels?

**STAFFING**

What staffing model do you use?

What would be the appropriate staffing model for managing a pandemic like COVID?

**SERVICE ALIGNMENT**

What service is occupational health aligned with at your facility?

Has this ever changed?

## INTERVIEW GUIDE

1  
2  
3 Are changes in service disruptive?  
4 What service should occupational health be aligned with?  
5  
6

### **FLU SEASON PREPAREDNESS**

7  
8 How are you planning to deal with flu and COVID-19 at the same time?  
9 How, if at all, have you updated approaches for PPE and environmental safety related to flu  
10 season?  
11  
12

### **PPE and MASK N95**

13  
14 What are your local protocols for PPE and masks?  
15 How have these changed over time? What triggered their change?  
16  
17

### **TELEWORK**

18  
19 How has telehealth impacted occupational health?  
20 How, if at all, are you preparing for any mental and/or physical health changes from increased  
21 telework?  
22  
23

### **LIGHTNING REPORT**

24  
25 What's working about how your local occupational health group is managing new  
26 responsibilities with COVID?  
27 What needs to change for you in order for you to provide better occupational health care?  
28  
29

### **SILVER LININGS**

30  
31 Have there been any benefits from COVID in your role or Occupational Health?  
32  
33

### **SNOWBALL**

34  
35 Who else should we talk to about the role of Occupational Health and COVID?  
36  
37  
38  
39  
40  
41  
42  
43  
44  
45  
46  
47  
48  
49  
50  
51  
52  
53  
54  
55  
56  
57  
58  
59  
60

## VA OCCUPATIONAL HEALTH NEEDS ASSESSMENT

### Problem Statement

In the United States, medical personnel carry a heavy burden regarding COVID-19 – in some states representing up to 20% of known coronavirus cases. Within the Veterans Health Administration (VHA), early involvement of Occupational Health (OH) may have protected employees, Veterans, and their families from even worse transmission rates. The roles and responsibilities of OH providers have greatly expanded and continue to evolve as the pandemic progresses.

### Background

With the emergence of COVID-19, on March 15<sup>th</sup>, 2020, the Deputy Under Secretary of Health for Operations and Management sent out a memo to Department of Veterans Affairs Network Directors putting Occupational Health in the center of the organizational response. As OH providers and teams across the VHA mobilized for management of COVID-19 spread and employee health, investigators at the Center for Innovation to Implementation (Ci2i) undertook a rapid national needs assessment. The goal of this research was to identify best practices and gaps in order to support the expanding role of OH providers by documenting early learnings and needs in advance of additional COVID-19 waves and future infectious pandemics.

### Executive Summary

1. VHA Occupational Health (OH) providers want standing policies for viral pandemics that include: standard chain-of-command; supply control; identified experts; protocols for delegating responsibilities; uniformity across sites
2. Gaps need to be addressed at the level of 1) structure (adequate staffing); 2) tools (EHR/community exposure communication); and 3) national-level leadership/communication
3. Opportunities exist to: leverage information-sharing via an existing national OH listserv; standardize and spread response through alignment with CDC and other federal protocols/agencies; develop an employee-focused electronic record to facilitate population management strategies

### Approach

This Lightning Report approach (Brown-Johnson et al., 2019) leverages rapid qualitative analysis to present main ideas from key informant interviews in a maximal variation sample. Insights are drawn from the input of n=11 OH providers (MD=5, NP=4, RN=2) interviewed for 30-60 minutes between July 7<sup>th</sup> and September 30<sup>th</sup> 2020. This sample is geographically diverse, representing 8 VHA facilities from diverse regions of the country (large, medium, and small facilities in the Mid-Atlantic; medium sites in South; large facilities in the West and Pacific Northwest). Key summary points are organized at the national and local level.

### Results

|                   |                                                                                                                                                                                                                                                                                                                                                                                                                                                                                                                                                                                                                                                                                                                                                                                      |
|-------------------|--------------------------------------------------------------------------------------------------------------------------------------------------------------------------------------------------------------------------------------------------------------------------------------------------------------------------------------------------------------------------------------------------------------------------------------------------------------------------------------------------------------------------------------------------------------------------------------------------------------------------------------------------------------------------------------------------------------------------------------------------------------------------------------|
| National Insights | <p><b>Facilitators to the ability of Occupational Health to adapt and expand roles and responsibilities in the context of COVID-19</b></p> <p><i>Peer-to-peer support</i></p> <ul style="list-style-type: none"> <li>Occupational Health Forum listserv facilitated connection among OH providers across the country</li> <li>Collegial spirit – sites willingly shared database tracking templates in Excel, Standard Operating Procedures (SOPs, i.e., policies), and information</li> <li>Highly trained experts were available and accessible through the listserv. Ideally, funding would have been available to support expert time spent answering queries from across the VHA in this venue</li> </ul> <p><i>CDC seen as central information and source for policies</i></p> |
|-------------------|--------------------------------------------------------------------------------------------------------------------------------------------------------------------------------------------------------------------------------------------------------------------------------------------------------------------------------------------------------------------------------------------------------------------------------------------------------------------------------------------------------------------------------------------------------------------------------------------------------------------------------------------------------------------------------------------------------------------------------------------------------------------------------------|

For more information please contact study PI - Dr. Karleen Giannitrapani [karleen.giannitrapani@va.gov](mailto:karleen.giannitrapani@va.gov)

VA OCCUPATIONAL HEALTH NEEDS ASSESSMENT

**Challenges/Gaps**

*Lack of centralized resources and policy, resulting in:*

- OH providers' desire for regular communication from national OH leadership
- Lack of protocols leading to individual sites creating protocols and policies (SOP) out of urgency as opposed to well thought out strategy
- Provider overwhelm, an example of which was related to how frequently the CDC updated/changed policies and recommendations
- Recognition of the need to build a "deeper bench" for OH – more expertise or experience from OH-adjacent specialties (e.g. infectious disease, public health, etc.)

*Tools needed*

- Electronic health record (EHR) and tracking during outbreaks to look across care populations (employees, patients, veterans)
- Employee management: Population health infrastructure exists for patients, allowing for large-scale problem-solving during disasters. In an infectious disease outbreak, employees become a population that also needs management

**Ideas from the field**

- As a policy-making position, national OH leadership needs full-time resources and highly-networked leadership with expertise and interdisciplinary leadership support, eg. from occupational health, mass testing, policy, infectious disease. Leadership would benefit from being "several people deep" with policy experience
- Emphasize communication: a) Reinstate previous OH 1.0FTE divided among five national subject matter experts to answer Forum listserv questions ("incredibly valuable") to provide direction and clinical guidance; b) more frequent and bi-directional communication between national OH leadership and front-line OH providers and staff
- Ideal: SOPs delivered from National leadership to all VHAs
- TB policy has been useful (ie., blood-born pathogen policy), and especially experience with a live TB incident in the last few years, which included contact tracing. Suggestion for viral pandemic drills considering how valuable lived experience has been

Local Issues and Insights

**Facilitators to the ability of OH to adapt and expand roles and responsibilities in the context of COVID-19**

*Staffing*

- Successful strategies for local staffing included: shifting ("detailing") staff from other services or temporarily-closed clinics, accessing transient labor pool, engaging travel nurses

*Local leadership and networks*

- When OH local leadership was well-networked across specialties within the local site, there was success in raising OH-related employee concerns to incident command
- Local leadership involvement in OH (e.g. site level executive leadership volunteering to detail with OH during surges) directly resulted in additional resources and leadership understanding of OH problems and needs
- OH demonstrated their value through involvement with local COVID-specific incident command; some sites leveraged that perceived value to secure more permanent staffing

For more information please contact study PI - Dr. Karleen Giannitrapani [karleen.giannitrapani@va.gov](mailto:karleen.giannitrapani@va.gov)

## VA OCCUPATIONAL HEALTH NEEDS ASSESSMENT

### Challenges/Gaps

#### Staffing

- Inexperienced/temporary staff resulted in lack of continuity, skills, and OH “know-how”
- Temporary staff were removed too quickly from OH (after having been detailed during surges)
- OH departments were chronically understaffed prior to COVID, putting them at an initial deficit
- Providers articulated burnout risk: No one took a break- “Local OH worked every day from the start of COVID through July”
- Site OH leaders emphasized they need a way to quantify/ justify the need for higher staffing (e.g., FTE per employee population)

#### Electronic Health Record (EHR)

- OH needed proper tools for tracking, charting, reporting, calculating. Without tools (eg. EHR), OH unable to leverage modern and efficient standing infrastructure (eg. QR codes for vaccines)
- Limited ability to use population management strategies
- Some VAs lacked current databases of who their employees were or where they worked (need better integration with updates from human resources)

#### Ideas from the field

- For large sites (4000+), procure coordinators for major OH health tasks (call center, testing, tracking/reporting, etc.) to distribute responsibilities within OH
- Institute programs for cross-training to OH, which will be vital to recruit new talent to OH and prepare for future crises
- Set expectations for potential staff flexing with cross-training through OH; prepare to pool staff resources across specialties (primary care, hospital, OH, etc.)
- Standardize across sites to leverage the work individual sites have done, for example template Excel & Access databases for calls, testing, contact tracing, and testing scheduling
- Develop a whole-person health record that respects and prioritizes employee privacy
- Possible funding source: move funding from new employee physical exams to EHR – even without physical exams since March there were low to no instances of new-hires being unfit for work

### Next steps

We will conduct additional interviews moving towards capturing the experience of OH providers that are located in smaller facilities and sites serving various regions of the country. We will also explicitly target sites serving rural populations.

### Acknowledgements

This work is supported by a VA Health Services Research and Development (HSR&D) rapid pilot (C19 20-207) to improve the VHA’s rapid response to COVID-19. Team members include Karleen Giannitrapani PhD, Karl Lorenz MD, Sara Singer PhD, Cati Brown-Johnson PhD, Matthew McCaa MTOT, and Cheyenne Deshields BS of VA HSR&D Ci2i; Elizabeth Yano PhD from VA HSR&D CSHIP; VA Occupational Health provider advisors.

### Lightning Report Method

For more information about this method, see: Brown-Johnson, C, Safaeinili, N, Zions, D, et al. The Stanford Lightning Report Method: A comparison of rapid qualitative synthesis results across four implementation evaluations. *Learn Health Sys.* 2020; 4:e10210. <https://doi.org/10.1002/lrh2.10210>

For more information please contact study PI - Dr. Karleen Giannitrapani [karleen.giannitrapani@va.gov](mailto:karleen.giannitrapani@va.gov)



Principal Investigator: Dr. Karleen Giannitrapani, PhD

VA HSR&D Project #: C19 20-207

September 30, 2020

VA OCCUPATIONAL HEALTH NEEDS ASSESSMENT

For peer review only

For more information please contact study PI - Dr. Karleen Giannitrapani [karleen.giannitrapani@va.gov](mailto:karleen.giannitrapani@va.gov)
